# Supplementary material for: Methyl radical also reacts by the frontside mechanism: An ab initio study of some homolytic substitution reactions of methyl radical at silicon, germanium and tin
Source: Royal Society of Chemistry journal article supplement (doi:10.1039/b211310d), 2003-03-04
Supplement: b211310d-esi.doc [file b211310d-esi.doc]

**Supplementary Materials**

**Methyl radical also reacts by the frontside mechanism: An Ab-Initio Study of Some Homolytic Substitution Reactions of Methyl Radical at Silicon, Germanium and Tin**

Hiroshi Matsubara,a* Sonia M. Horvat,b and Carl H. Schiesserb*

a Department of Chemistry, Faculty of Arts and Sciences, Osaka Prefecture University, Sakai, Osaka 599-8531, Japan

b School of Chemistry, Bio21 Institute of Molecular Science and Biotechnology, The University of Melbourne, Victoria, Australia, 3010

________________________________________________________________

HF/6-311G**, HF/DZP, MP2/6-311G**, MP2,DZP, MP2/cc-pVDZ, MP2/aug-cc-pVDZ, B3LYP/6-311G** and B3LYP/DZP Gaussian Archive entries for the optimized structures in this study and higher-level calculated single-point energies (27pages).

_____________________________________________________________________________

**Backside transition state 4 (Y = Z = Si)**

# UHF/6-311G**

1\1\ MARCCENTRE-ANET06\PTS\UHF\6-311G(d,p)\C1H9Si2(2)\HIROSHI\01-Aug-2002\1\\#UHF/6-311G** SCF=DIRECT OPT=(TS,CALCFC,EF,Z-MATRIX) OPTCYC=100 GEOM=CHECKPOINT GUESS=CHECK\\backside attack of C-Si-Si\\0,2\Si\C,1,r1\H,1,r11,2,a11\H,1,r11,2,a11,3,d11,0\H,1,r11,2,a11,3,d12,0\Si,1,r2,3,a2,4,d2,0\H,2,r21,1,a21,3,d21,0\H,2,r21,1,a21,4,d21,0\H,2,r21,1,a21,5, d21,0\H,6,r31,1,a31,3,d31,0\H,6,r31,1,a31,4,d31,0\H,6,r31,1,a31,5,d31,0\\r1=2.17873998\r2=2.52699888\r11=1.48112055\r21=1.0800443\r31=1.48125294\a11=89.39463558\a2=90.60569594\a21=105.65222313\a31=110.0247851\d11=119.99996574\d12=-120.00001602\d2=-91.04893985\d21=179.99894228\d31=179.99976259\\Version=DEC-AXP-OSF/1-G98RevA.7\HF=-620.8780857\S2=0.804601\S2-1=0.\S2A=0.751305\RMSD=5.329e-09\RMSF=6.575e-06\Dipole=0.0000007,-0.0000012,0.5141326\PG=C01 [X(C1H9Si2)]\\@

# UHF/DZP

1\1\ MARCCENTRE-ANET08\PTS\UHF\Gen\C1H9Si2(2)\HIROSHI\06-Aug-2002\1\\#UHF/GEN PSEUDO=READ SCF=DIRECT OPT=(TS,EF,CALCFC) GEOM=CHECKPOINT GUESS=CHECK OPTCYC=100\\backside attack of C-Si-Si\\0,2\Si\C,1,r1\H,1,r11,2,a11\H,1,r11,2,a11,3,d11,0\H,1,r11,2,a11,3,d12,0\Si,1,r2,3,a2,4,d2,0\H,2,r21,1,a21,3,d21,0\H,2,r21,1,a21,4,d21,0\H,2,r21,1,a21,5,d21,0\H,6,r31,1,a31,3,d31,0\H,6,r31,1,a31,4,d31,0\H,6,r31,1,a31,5,d31,0\\r1=2.17966342\r2=2.52504706\r11=1.47044355\r21=1.08073701\r31=1.47096854\a11=89.53527353\a2=90.46516096\a21=105.74527846\a31=109.91769028\d11=119.99995211\d12=-120.00002477\d2=-90.80564826\d21=179.99995164\d31=179.99998833\\Version=DEC-AXP-OSF/1-G98RevA.7\HF=-50.5520103\S2=0.805458\S2-1=0.\S2A=0.75129\RMSD=6.923e-09\RMSF=3.651e-05\Dipole=0.0000003,-0.0000005,0.452812\PG=C01 [X(C1H9Si2)]\\@

# MP2/6-311G**

1\1\ MARCCENTRE-ANET06\PTS\UMP2-FC\6-311G(d,p)\C1H9Si2(2)\HIROSHI\04-Aug-2002\1\\#MP2/6-311G** SCF=DIRECT OPT=(TS,CALCFC,EF,Z-MATRIX) OPTCYC=100 GEOM=CHECKPOINT GUESS=CHECK\\backside attack of C-Si-Si\\0,2\Si\C,1,r1\H,1,r11,2,a11\H,1,r11,2,a11,3,d11,0\H,1,r11,2,a11,3,d12,0\Si,1,r2,3,a2,4,d2,0\H,2,r21,1,a21,3,d21,0\H,2,r21,1,a21,4,d21,0\H,2,r21,1,a21,5,d21,0\H,6,r31,1,a31,3,d31,0\H,6,r31,1,a31,4,d31,0\H,6,r31,1,a31,5,d31,0\\r1=2.20843854\r2=2.42628652\r11=1.48268303\r21=1.08752698\r31=1.47963316\a11=84.89803188\a2=95.11048558\a21=104.85421057\a31=110.29471684\d11=119.99968395\d12=-120.00007386\d2=-98.78354129\d21=179.99990695\d31=179.99986476\\Version=DEC-AXP-OSF/1-G98RevA.7\HF=-620.8817502\MP2=-621.2545896\PUHF=-620.8867835\PMP2-0=-621.2580279\S2=0.780994\S2-1=0.761131\S2A=0.750582\RMSD=5.763e-09\RMSF=1.651e-05\Dipole=0.0000279,-0.0000901,0.5551793\PG=C01 [X(C1H9Si2)]\\@

# MP2/DZP

1\1\ MARCCENTRE-BNET4\PTS\UMP2-FC\Gen\C1H9Si2(2)\HIROSHI\08-Aug-2002\1\\#MP2/GEN PSEUDO=READ SCF=DIRECT OPT=(TS,EF,CALCFC) GEOM=CHECKPOINT GUESS=CHECK OPTCYC=100 DENSITY=CURRENT\\backside attack of C-Si-Si\\0,2\Si\C,1,r1\H,1,r11,2,a11\H,1,r11,2,a11,3,d11,0\H,1,r11,2,a11,3,d12,0\Si,1,r2,3,a2,4,d2,0\H,2,r21,1,a21,3,d21,0\H,2,r21,1,a21,4,d21,0\H,2,r21,1,a21,5,d21,0\H,6,r31,1,a31,3,d31,0\H,6,r31,1,a31,4,d31,0\H,6,r31,1,a31,5,d31,0\\r1=2.21435923\r2=2.42587843\r11=1.47234656\r21=1.08791134\r31=1.46986757\a11=85.5400473\a2=94.45038948\a21=104.8235662\a31=110.26358418\d11=120.00107302\d12=-119.99928095\d2=-97.6559993\d21=180.00002842\d31=179.99994757\\Version=DEC-AXP-OSF/1-G98RevA.7\HF=-50.555429\MP2=-50.9092134\PUHF=-50.5607363\PMP2-0=-50.9128356\S2=0.782798\S2-1=0.761737\S2A=0.75062\RMSD=9.200e-09\RMSF=2.088e-05\Dipole=-0.5089676,-0.0000289,0.0000622\PG=C01 [X(C1H9Si2)]\\@

# MP2/cc-pVDZ

1\1\ MARCCENTRE-ANET06\PTS\UMP2-FC\CC-pVDZ\C1H9Si2(2)\HIROSHI\09-Aug-2002\1\\#MP2/CC-PVDZ SCF=DIRECT OPT=(TS,EF,CALCFC) GEOM=CHECKPOINT GUESS=CHECK OPTCYC=100 DENSITY=CURRENT\\backside attack of C-Si-Si\\0,2\Si\C,1,r1\H,1,r11,2,a11\H,1,r11,2,a11,3,d11,0\H,1,r11,2,a11,3,d12,0\Si,1,r2,3,a2,4,d2,0\H,2,r21,1,a21,3,d21,0\H,2,r21,1,a21,4,d21,0\H,2,r21,1,a21,5,d21,0\H,6,r31,1,a31,3,d31,0\H,6,r31,1,a31,4,d31,0\H,6,r31,1,a31,5,d31,0\\r1=2.23286566\r2=2.44989326\r11=1.49422662\r21=1.09749789\r31=1.4918696\a11=85.17120135\a2=94.82851716\a21=104.54262844\a31=110.29037475\d11=120.00003208\d12=-119.99998388\d2=-98.29486125\d21=179.99994191\d31=180.00002993\\Version=DEC-AXP-OSF/1-G98RevA.7\HF=-620.8571095\MP2=-621.220257\PUHF=-620.8622014\PMP2-0=-621.223767\S2=0.782378\S2-1=0.76203\S2A=0.75062\RMSD=4.351e-09\RMSF=6.749e-06\Dipole=-0.6107244,-0.0000011,-0.0000017\PG=C01 [X(C1H9Si2)]\\@

# MP2/aug-cc-pVDZ

1\1\ MARCCENTRE-ANET03\PTS\UMP2-FC\Aug-CC-pVDZ\C1H9Si2(2)\HIROSHI\12-Aug-2002\1\\#MP2/AUG-CC-PVDZ SCF=DIRECT OPT=(TS,EF,CALCFC) GEOM=CHECKPOINT GUESS=CHECK OPTCYC=100 DENSITY=CURRENT\\backside attack of C-Si-Si\\0,2\Si\C,1,r1\H,1,r11,2,a11\H,1,r11,2,a11,3,d11,0\H,1,r11,2,a11,3,d12,0\Si,1,r2,3,a2,4,d2,0\H,2,r21,1,a21,3,d21,0\H,2,r21,1,a21,4,d21,0\H,2,r21,1,a21,5,d21,0\H,6,r31,1,a31,3,d31,0\H,6,r31,1,a31,4,d31,0\H,6,r31,1,a31,5,d31,0\\r1=2.24043065\r2=2.44946346\r11=1.49651196\r21=1.09571626\r31=1.4934353\a11=85.00489341\a2=94.99515762\a21=104.33817683\a31=110.07343107\d11=120.00000043\d12=-119.99999873\d2=-98.57651891\d21=179.99999884\d31=179.99999844\\Version=DEC-AXP-OSF/1-G98RevA.7\HF=-620.8613184\MP2=-621.2418894\PUHF=-620.86635\PMP2-0=-621.2453578\S2=0.782157\S2-1=0.761947\S2A=0.750619\RMSD=8.309e-09\RMSF=1.556e-05\Dipole=-0.5661707,0.0000005,-0.0000007\PG=C01 [X(C1H9Si2)]\\@

# QCISD/6-311G**//MP2/6-311G**

QCISD=-621.325314

# QCISD/DZP//MP2/DZP

QCISD=-50.9780697

# QCISD/cc-pVDZ//MP2/cc-pVDZ

QCISD=-621.2950977

# QCISD/aug-cc-pVDZ//MP2/aug-cc-pVDZ

QCISD=-621.318225

# CCSD(T)/6-311G**//MP2/6-311G**

CCSD(T)=-621.3371864

# CCSD(T)/DZP//MP2/DZP

CCSD(T)=-50.9881385

# CCSD(T)/cc-pVDZ//MP2/cc-pVDZ

CCSD(T)=-621.3062309

# CCSD(T)/aug-cc-VDZ//MP2/aug-cc-pVDZ

CCSD(T)=-621.3315165

# B3LYP/6-311G**

1\1\ MARCCENTRE-BNET1\PTS\UB3LYP\6-311G(d,p)\C1H9Si2(2)\HIROSHI\12-Aug-2002\1\\#B3LYP/6-311G** SCF=DIRECT OPT=(TS,CALCFC,EF,Z-MATRIX) OPTCYC=100 GEOM=CHECKPOINT GUESS=CHECK DENSITY=CURRENT\\backside attack of C-Si-Si\\0,2\Si\C,1,r1\H,1,r11,2,a11\H,1,r11,2,a11,3,d11,0\H,1,r11,2,a11,3,d12,0\Si,1,r2,3,a2,4,d2,0\H,2,r21,1,a21,3,d21,0\H,2,r21,1,a21,4,d21,0\H,2,r21,1,a21,5,d21,0\H,6,r31,1,a31,3,d31,0\H,6,r31,1,a31,4,d31,0\H,6,r31,1,a31,5,d31,0\\r1=2.30168332\r2=2.44121664\r11=1.48897715\r21=1.08577138\r31=1.48963532\a11=83.64007013\a2=96.35986038\a21=103.66579787\a31=110.55943655\d11=119.99913348\d12=-120.00066232\d2=-100.84244167\d21=180.03880411\d31=180.03074256\\Version=DEC-AXP-OSF/1-G98RevA.7\HF=-622.4774008\S2=0.757288\S2-1=0.\S2A=0.750029\RMSD=4.257e-09\RMSF=9.790e-06\Dipole=-0.000005,0.0000754,0.5334298\PG=C01 [X(C1H9Si2)]\\@

# B3LYP/DZP

1\1\ MARCCENTRE-ANET06\PTS\UB3LYP\Gen\C1H9Si2(2)\HIROSHI\12-Aug-2002\1\\#B3LYP/GEN PSEUDO=READ SCF=DIRECT OPT=(TS,EF,CALCFC) GEOM=CHECKPOINT GUESS=CHECK OPTCYC=100 DENSITY=CURRENT\\backside attack of C-Si-Si\\0,2\Si\C,1,r1\H,1,r11,2,a11\H,1,r11,2,a11,3,d11,0\H,1,r11,2,a11,3,d12,0\Si,1,r2,3,a2,4,d2,0\H,2,r21,1,a21,3,d21,0\H,2,r21,1,a21,4,d21,0\H,2,r21,1,a21,5,d21,0\H,6,r31,1,a31,3,d31,0\H,6,r31,1,a31,4,d31,0\H,6,r31,1,a31,5,d31,0\\r1=2.28237163\r2=2.43811043\r11=1.479562\r21=1.08977912\r31=1.47976263\a11=84.31353427\a2=95.69177923\a21=103.97229458\a31=110.57204612\d11=120.00436886\d12=-119.99271589\d2=-99.75035999\d21=179.97503286\d31=179.98495743\\Version=DEC-AXP-OSF/1-G98RevA.7\HF=-51.2315894\S2=0.757603\S2-1=0.\S2A=0.750031\RMSD=4.625e-09\RMSF=1.422e-05\Dipole=0.0000122,-0.0000474,0.5197842\PG=C01 [X(C1H9Si2)]\\@

**Frontside transition state 5 (Y = Z = Si)**

# UHF/6-311G**

1\1\ MARCCENTRE-BNET4\FTS\UHF\6-311G(d,p)\C1H9Si2(2)\HIROSHI\30-Jul-2002\1\\#UHF/6-311G** SCF=DIRECT OPT=(TS,CALCFC,EF,Z-MATRIX) GEOM=CHECKPOINT GUESS=CHECK OPTCYC=100\\frontside attack of C-Si-Si\\0,2\Si\C,1,r1\Si,1,r2,2,a1\H,1,r11,2,a11,3,d11,0\H,1,r12,2,a12,3,d12,0\H,1,r13,3,a13,4,d13,0\H,2,r21,1,a21,4,d21,0\H,2,r22,1,a22,4,d22,0\H,2,r23,1,a23,4,d23,0\H,3,r31,1,a31,2,d31,0\H,3,r32,1,a32,2,d32,0\H,3,r33,1,a33,2,d33,0\\r1=2.14540804\r2=2.52247094\r11=1.48180844\r12=1.48180999\r13=1.52448706\r21=1.08023326\r22=1.08285052\r23=1.08023266\r31=1.47639998\r32=1.47670492\r33=1.47670631\a1=81.98711547\a11=92.36190201\a12=92.35961232\a13=76.41006632\a21=111.16053995\a22=97.57281693\a23=111.15859476\a31=116.62438081\a32=104.92507839\a33=104.92285058\d11=-123.31158022\d12=123.31746655\d13=92.44971725\d21=173.86511228\d22=56.69231336\d23=-60.48035479\d31=-0.01245875\d32=-121.84781385\d33=121.82077641\\Version=DEC-AXP-OSF/1-G98RevA.7\HF=-620.8775676\S2=0.796906\S2-1=0.\S2A=0.750932\RMSD=4.444e-09\RMSF=9.888e-06\Dipole=0.2472534,0.0000079,0.5495333\PG=C01 [X(C1H9Si2)]\\@

# UHF/DZP

1\1\ MARCCENTRE-ANET06\FTS\UHF\Gen\C1H9Si2(2)\HIROSHI\06-Aug-2002\1\\#UHF/GEN PSEUDO=READ SCF=DIRECT OPT=(TS,EF,CALCFC) GEOM=CHECKPOINT GUESS=CHECK OPTCYC=100\\frontside attack of C-Si-Si\\0,2\Si\C,1,r1\Si,1,r2,2,a1\H,1,r11,2,a11,3,d11,0\H,1,r12,2,a12,3,d12,0\H,1,r13,3,a13,4,d13,0\H,2,r21,1,a21,4,d21,0\H,2,r22,1,a22,4,d22,0\H,2,r23,1,a23,4,d23,0\H,3,r31,1,a31,2,d31,0\H,3,r32,1,a32,2,d32,0\H,3,r33,1,a33,2,d33,0\\r1=2.12938697\r2=2.51459311\r11=1.47332022\r12=1.47332964\r13=1.51920205\r21=1.08088008\r22=1.08352119\r23=1.08087825\r31=1.46738979\r32=1.46716549\r33=1.46716785\a1=82.34021616\a11=92.89245986\a12=92.88532619\a13=76.03382121\a21=111.14938624\a22=98.21895512\a23=111.14620569\a31=116.67453121\a32=104.84535291\a33=104.83901859\d11=-123.43615415\d12=123.45541305\d13=91.61957828\d21=173.87166817\d22=56.5699993\d23=-60.73170775\d31=-0.03122038\d32=-121.95499152\d33=121.88694749\\Version=DEC-AXP-OSF/1-G98RevA.7\HF=-50.5503501\S2=0.797373\S2-1=0.\S2A=0.751\RMSD=9.616e-09\RMSF=3.010e-05\Dipole=0.237755,0.0000453,0.4603017\PG=C01 [X(C1H9Si2)]\\@

# MP2/6-311G**

1\1\ MARCCENTRE-BNET2\FTS\UMP2-FC\6-311G(d,p)\C1H9Si2(2)\HIROSHI\07-Aug-2002\1\\#MP2/6-311G** SCF=DIRECT OPT=(TS,CALCFC,EF,Z-MATRIX) GEOM=CHECKPOINT GUESS=CHECK OPTCYC=100 DENSITY=CURRENT\\frontside attack of C-Si-Si\\0,2\Si\C,1,r1\Si,1,r2,2,a1\H,1,r11,2,a11,3,d11,0\H,1,r12,2,a12,3,d12,0\H,1,r13,3,a13,4,d13,0\H,2,r21,1,a21,4,d21,0\H,2,r22,1,a22,4,d22,0\H,2,r23,1,a23,4,d23,0\H,3,r31,1,a31,2,d31,0\H,3,r32,1,a32,2,d32,0\H,3,r33,1,a33,2,d33,0\\r1=2.2228112\r2=2.40291342\r11=1.47972993\r12=1.47973025\r13=1.51945066\r21=1.08736872\r22=1.08898047\r23=1.08736805\r31=1.47518477\r32=1.47744269\r33=1.47744471\a1=81.39757364\a11=87.84616857\a12=87.84475708\a13=84.07441008\a21=109.37842859\a22=96.67999981\a23=109.37728219\a31=116.6663394\a32=105.665224\a33=105.66268204\d11=-122.63542355\d12=122.63448534\d13=97.96720861\d21=175.08250629\d22=57.36912234\d23=-60.3443191\d31=-0.01217879\d32=-121.88155627\d33=121.85496094\\Version=DEC-AXP-OSF/1-G98RevA.7\HF=-620.8806997\MP2=-621.2554838\PUHF=-620.8859491\PMP2-0=-621.2590988\S2=0.782833\S2-1=0.762182\S2A=0.750555\RMSD=8.499e-10\RMSF=8.159e-07\Dipole=0.119852,0.0000186,0.5322068\Polar=86.1458966,0.000309,58.3247183,-10.1812573,-0.0000419,86.2781169\PG=C01 [X(C1H9Si2)]\\@

# MP2/DZP

1\1\ MARCCENTRE-ANET06\FTS\UMP2-FC\Gen\C1H9Si2(2)\HIROSHI\08-Aug-2002\1\\#MP2/GEN PSEUDO=READ SCF=DIRECT OPT=(TS,EF,CALCFC) GEOM=CHECKPOINT GUESS=CHECK OPTCYC=100 DENSITY=CURRENT\\frontside attack of C-Si-Si\\0,2\Si\C,1,r1\Si,1,r2,2,a1\H,1,r11,2,a11,3,d11,0\H,1,r12,2,a12,3,d12,0\H,1,r13,3,a13,4,d13,0\H,2,r21,1,a21,4,d21,0\H,2,r22,1,a22,4,d22,0\H,2,r23,1,a23,4,d23,0\H,3,r31,1,a31,2,d31,0\H,3,r32,1,a32,2,d32,0\H,3,r33,1,a33,2,d33,0\\r1=2.17700884\r2=2.40625059\r11=1.47276962\r12=1.47167193\r13=1.51625389\r21=1.08806836\r22=1.08980468\r23=1.08947679\r31=1.46617203\r32=1.46855684\r33=1.4672762\a1=78.99820134\a11=88.68810972\a12=89.66559546\a13=86.61937244\a21=109.1110981\a22=97.88850978\a23=110.88278127\a31=112.32467902\a32=105.67450654\a33=110.63872599\d11=-122.05941942\d12=123.63975885\d13=97.38077644\d21=168.63771803\d22=51.14616372\d23=-66.3699077\d31=42.92139104\d32=-76.08406951\d33=165.62206017\\Version=DEC-AXP-OSF/1-G98RevA.7\HF=-50.551775\MP2=-50.9081054\PUHF=-50.5576957\PMP2-0=-50.9121981\S2=0.788168\S2-1=0.764333\S2A=0.750725\RMSD=3.941e-09\RMSF=1.602e-06\Dipole=-0.0351775,0.4313655,-0.0141323\PG=C01 [X(C1H9Si2)]\\@

# MP2/cc-pVDZ

1\1\ MARCCENTRE-ANET08\FTS\UMP2-FC\CC-pVDZ\C1H9Si2(2)\HIROSHI\10-Aug-2002\1\\#MP2/CC-PVDZ SCF=DIRECT OPT=(TS,EF,CALCFC) GEOM=CHECKPOINT GUESS=CHECK OPTCYC=100 DENSITY=CURRENT\\frontside attack of C-Si-Si\\0,2\Si\C,1,r1\Si,1,r2,2,a1\H,1,r11,2,a11,3,d11,0\H,1,r12,2,a12,3,d12,0\H,1,r13,3,a13,4,d13,0\H,2,r21,1,a21,4,d21,0\H,2,r22,1,a22,4,d22,0\H,2,r23,1,a23,4,d23,0\H,3,r31,1,a31,2,d31,0\H,3,r32,1,a32,2,d32,0\H,3,r33,1,a33,2,d33,0\\r1=2.22475762\r2=2.42439455\r11=1.49196764\r12=1.49196179\r13=1.53856502\r21=1.0978632\r22=1.09904622\r23=1.09786938\r31=1.48790411\r32=1.48962059\r33=1.48962275\a1=82.12507162\a11=88.50915614\a12=88.51737844\a13=82.97032569\a21=109.04622907\a22=97.18981034\a23=109.05147618\a31=116.77178234\a32=105.55241279\a33=105.56349193\d11=-122.7235248\d12=122.71475274\d13=96.75940613\d21=175.13808361\d22=57.25862461\d23=-60.61961666\d31=0.04962846\d32=-121.89264834\d33=121.99777774\\Version=DEC-AXP-OSF/1-G98RevA.7\HF=-620.8550583\MP2=-621.2197856\PUHF=-620.8605973\PMP2-0=-621.2236521\S2=0.786571\S2-1=0.764246\S2A=0.750665\RMSD=5.120e-09\RMSF=2.014e-06\Dipole=0.0736767,0.5313571,-0.0000353\PG=C01 [X(C1H9Si2)]\\@

# MP2/aug-cc-pVDZ

1\1\ MARCCENTRE-ANET03\FTS\UMP2-FC\Aug-CC-pVDZ\C1H9Si2(2)\HIROSHI\18-Aug-2002\1\\#MP2/AUG-CC-PVDZ SCF=DIRECT OPT=(TS,EF,CALCFC) GEOM=CHECKPOINT GUESS=CHECK OPTCYC=100 DENSITY=CURRENT\\frontside attack of C-Si-Si\\0,2\Si\C,1,r1\Si,1,r2,2,a1\H,1,r11,2,a11,3,d11,0\H,1,r12,2,a12,3,d12,0\H,1,r13,3,a13,4,d13,0\H,2,r21,1,a21,4,d21,0\H,2,r22,1,a22,4,d22,0\H,2,r23,1,a23,4,d23,0\H,3,r31,1,a31,2,d31,0\H,3,r32,1,a32,2,d32,0\H,3,r33,1,a33,2,d33,0\\r1=2.23721157\r2=2.42927083\r11=1.49327551\r12=1.49327214\r13=1.53832906\r21=1.09592289\r22=1.09756394\r23=1.09592469\r31=1.4890356\r32=1.49136546\r33=1.49136095\a1=81.01779128\a11=88.33362296\a12=88.33764238\a13=83.46313376\a21=109.09579998\a22=96.47458874\a23=109.09765066\a31=116.84845943\a32=105.19689369\a33=105.20369705\d11=-122.7169342\d12=122.71600947\d13=97.65696872\d21=175.00262916\d22=57.27658739\d23=-60.44896351\d31=0.0297792\d32=-122.01542856\d33=122.08080773\\Version=DEC-AXP-OSF/1-G98RevA.7\HF=-620.8599407\MP2=-621.242707\PUHF=-620.8654556\PMP2-0=-621.246557\S2=0.786575\S2-1=0.764252\S2A=0.750666\RMSD=4.925e-09\RMSF=2.228e-05\Dipole=0.0414532,0.5153371,-0.0000313\PG=C01 [X(C1H9Si2)]\\@

# QCISD/6-311G**//MP2/6-311G**

QCISD=-621.3250899

# QCISD/DZP//MP2/DZP

QCISD=-50.9759426

# QCISD/cc-pVDZ//MP2/cc-pVDZ

QCISD=-621.2935505

# QCISD/aug-cc-pVDZ//MP2/aug-cc-pVDZ

QCISD=-621.3177066

# CCSD(T)/6-311G**//MP2/6-311G**

CCSD(T)=-621.3370239

# CCSD(T)/DZP//MP2/DZP

CCSD(T)=-50.9861718

# CCSD(T)/cc-pVDZ//MP2/cc-pVDZ

CCSD(T)=-621.3047742

# CCSD(T)/aug-cc-pVDZ//MP2/aug-cc-pVDZ

CCSD(T)=-621.3310695

# B3LYP/6-311G**

1\1\ MARCCENTRE-BNET4\FTS\UB3LYP\6-311G(d,p)\C1H9Si2(2)\HIROSHI\12-Aug-2002\1\\#B3LYP/6-311G** SCF=DIRECT OPT=(TS,CALCFC,EF,Z-MATRIX) GEOM=CHECKPOINT GUESS=CHECK OPTCYC=100 DENSITY=CURRENT\\frontside attack ofC-Si-Si\\0,2\Si\C,1,r1\Si,1,r2,2,a1\H,1,r11,2,a11,3,d11,0\H,1,r12,2,a12,3,d12,0\H,1,r13,3,a13,4,d13,0\H,2,r21,1,a21,4,d21,0\H,2,r22,1,a22,4,d22,0\H,2,r23,1,a23,4,d23,0\H,3,r31,1,a31,2,d31,0\H,3,r32,1,a32,2,d32,0\H,3,r33,1,a33,2,d33,0\\r1=2.24815533\r2=2.40739346\r11=1.49007253\r12=1.49007235\r13=1.53898037\r21=1.08611364\r22=1.08711123\r23=1.08611441\r31=1.485898\r32=1.48679194\r33=1.48679094\a1=85.55870647\a11=87.31067759\a12=87.31097116\a13=84.94359775\a21=107.56072818\a22=98.66732741\a23=107.5603175\a31=115.80363546\a32=106.80926834\a33=106.81172592\d11=-122.3169535\d12=122.3173695\d13=95.95928195\d21=176.18266662\d22=57.68059429\d23=-60.82117184\d31=0.00941292\d32=-121.66613692\d33=121.68711199\\Version=DEC-AXP-OSF/1-G98RevA.7\HF=-622.4742724\S2=0.757591\S2-1=0.\S2A=0.750031\RMSD=4.429e-09\RMSF=1.881e-06\Dipole=0.0770551,-0.0000137,0.4942245\PG=C01 [X(C1H9Si2)]\\@

# B3LYP/DZP

1\1\ MARCCENTRE-ANET08\FTS\UB3LYP\Gen\C1H9Si2(2)\HIROSHI\12-Aug-2002\1\\#B3LYP/GEN PSEUDO=READ SCF=DIRECT OPT=(TS,EF,CALCFC) GEOM=CHECKPOINT GUESS=CHECK OPTCYC=100 DENSITY=CURRENT\\frontside attack of C-Si-Si\\0,2\Si\C,1,r1\Si,1,r2,2,a1\H,1,r11,2,a11,3,d11,0\H,1,r12,2,a12,3,d12,0\H,1,r13,3,a13,4,d13,0\H,2,r21,1,a21,4,d21,0\H,2,r22,1,a22,4,d22,0\H,2,r23,1,a23,4,d23,0\H,3,r31,1,a31,2,d31,0\H,3,r32,1,a32,2,d32,0\H,3,r33,1,a33,2,d33,0\\r1=2.21346431\r2=2.39227449\r11=1.48219211\r12=1.48217674\r13=1.53676828\r21=1.09013625\r22=1.09128093\r23=1.09013611\r31=1.47705893\r32=1.47736922\r33=1.47735942\a1=86.32988059\a11=88.29140426\a12=88.30484648\a13=84.10984941\a21=107.79886445\a22=99.44461163\a23=107.79809291\a31=115.68060381\a32=107.01621092\a33=107.02768181\d11=-122.42238774\d12=122.41176328\d13=94.32893459\d21=176.15534509\d22=57.575064\d23=-61.0044858\d31=0.043034\d32=-121.6315396\d33=121.72915844\\Version=DEC-AXP-OSF/1-G98RevA.7\HF=-51.2284668\S2=0.758017\S2-1=0.\S2A=0.750036\RMSD=6.964e-09\RMSF=2.722e-06\Dipole=0.0562772,-0.0000331,0.439428\PG=C01 [X(C1H9Si2)]\\@

**Backside transition state 4 (Y = Si, Z = Ge)**

**UHF/DZP**

1\1\ MARCCENTRE-BNET1\PTS\UHF\Gen\C1H9Ge1Si1(2)\HIROSHI\06-Aug-2002\1\\#UHF/GEN PSEUDO=READ SCF=DIRECT OPT=(TS,EF,CALCFC) GEOM=CHECKPOINT GUESS=CHECK OPTCYC=100\\backside attack of C-Si-Ge\\0,2\Si\C,1,r1\H,1,r11,2,a11\H,1,r11,2,a11,3,d11,0\H,1,r11,2,a11,3,d12,0\Ge,1,r2,3,a2,4,d2,0\H,2,r21,1,a21,3,d21,0\H,2,r21,1,a21,4,d21,0\H,2,r21,1,a21,5,d21,0\H,6,r31,1,a31,3,d31,0\H,6,r31,1,a31,4,d31,0\H,6,r31,1,a31,5,d31,0\\r1=2.20233704\r2=2.59797005\r11=1.46799868\r21=1.08036461\r31=1.5395226\a11=89.14424294\a2=90.85548372\a21=105.35047292\a31=110.34337228\d11=120.00003363\d12=-119.99998307\d2=-91.48133431\d21=179.99957897\d31=179.99994721\\Version=DEC-AXP-OSF/1-G98RevA.7\HF=-50.4249291\S2=0.808914\S2-1=0.\S2A=0.751316\RMSD=2.506e-09\RMSF=5.881e-06\Dipole=-0.0000007,0.0000013,0.6006613\PG=C01 [X(C1H9Ge1Si1)]\\@

**MP2/DZP**

1\1\ MARCCENTRE-ANET06\PTS\UMP2-FC\Gen\C1H9Ge1Si1(2)\HIROSHI\09-Aug-2002\1\\#MP2/GEN PSEUDO=READ SCF=DIRECT OPT=(TS,EF,CALCFC) GEOM=CHECKPOINT GUESS=CHECK OPTCYC=100 DENSITY=CURRENT\\backside attack of C-Si-Ge\\0,2\Si\C,1,r1\H,1,r11,2,a11\H,1,r11,2,a11,3,d11,0\H,1,r11,2,a11,3,d12,0\Ge,1,r2,3,a2,4,d2,0\H,2,r21,1,a21,3,d21,0\H,2,r21,1,a21,4,d21,0\H,2,r21,1,a21,5,d21,0\H,6,r31,1,a31,3,d31,0\H,6,r31,1,a31,4,d31,0\H,6,r31,1,a31,5,d31,0\\r1=2.24077862\r2=2.49764608\r11=1.47002698\r21=1.087515\r31=1.53758316\a11=85.04489073\a2=94.96071435\a21=104.41885576\a31=110.70448092\d11=119.99925367\d12=-120.00028018\d2=-98.52100238\d21=180.00004807\d31=179.99991036\\Version=DEC-AXP-OSF/1-G98RevA.7\HF=-50.42838\MP2=-50.7775978\PUHF=-50.4335272\PMP2-0=-50.7811508\S2=0.783065\S2-1=0.762361\S2A=0.750602\RMSD=9.876e-09\RMSF=5.930e-06\Dipole=0.6210718,0.0000385,0.0000392\PG=C01 [X(C1H9Ge1Si1)]\\@

**QCISD/DZP//MP2/DZP**

QCISD=-50.846065

**CCSD(T)/DZP//MP2/DZP**

CCSD(T)=-50.8559714

**B3LYP/DZP**

1\1\ MARCCENTRE-ANET04\PTS\UB3LYP\Gen\C1H9Ge1Si1(2)\HIROSHI\13-Aug-2002\1\\#B3LYP/GEN PSEUDO=READ SCF=DIRECT OPT=(TS,EF,CALCFC) GEOM=CHECKPOINT GUESS=CHECK OPTCYC=100 DENSITY=CURRENT\\backside attack of C-Si-Ge\\0,2\Si\C,1,r1\H,1,r11,2,a11\H,1,r11,2,a11,3,d11,0\H,1,r11,2,a11,3,d12,0\Ge,1,r2,3,a2,4,d2,0\H,2,r21,1,a21,3,d21,0\H,2,r21,1,a21,4,d21,0\H,2,r21,1,a21,5,d21,0\H,6,r31,1,a31,3,d31,0\H,6,r31,1,a31,4,d31,0\H,6,r31,1,a31,5,d31,0\\r1=2.32756408\r2=2.50584394\r11=1.47664414\r21=1.08927597\r31=1.54778818\a11=83.38419819\a2=96.622775\a21=103.32603767\a31=111.0075926\d11=119.99605996\d12=-120.00344965\d2=-101.29983821\d21=180.01799437\d31=180.06259756\\Version=DEC-AXP-OSF/1-G98RevA.7\HF=-51.1088793\S2=0.757722\S2-1=0.\S2A=0.75003\RMSD=4.023e-09\RMSF=1.987e-05\Dipole=0.0000364,-0.0000515,0.6173022\PG=C01 [X(C1H9Ge1Si1)]\\@

**Frontside transition state 5 (Y = Si, Z = Ge)**

# UHF/DZP

1\1\ MARCCENTRE-ANET06\FTS\UHF\Gen\C1H9Ge1Si1(2)\HIROSHI\06-Aug-2002\1\\#UHF/GEN PSEUDO=READ SCF=DIRECT OPT=(TS,EF,CALCFC) GEOM=CHECKPOINT GUESS=CHECK OPTCYC=100\\frontside attack of C-Si-Ge\\0,2\Si\C,1,r1\Ge,1,r2,2,a1\H,1,r11,2,a11,3,d11,0\H,1,r12,2,a12,3,d12,0\H,1,r13,3,a13,4,d13,0\H,2,r21,1,a21,4,d21,0\H,2,r22,1,a22,4,d22,0\H,2,r23,1,a23,4,d23,0\H,3,r31,1,a31,2,d31,0\H,3,r32,1,a32,2,d32,0\H,3,r33,1,a33,2,d33,0\\r1=2.16549139\r2=2.5955425\r11=1.47292469\r12=1.47293468\r13=1.50889851\r21=1.08031863\r22=1.08276365\r23=1.08031412\r31=1.53517458\r32=1.5351797\r33=1.53503036\a1=81.17744268\a11=91.62941948\a12=91.61947098\a13=77.64932525\a21=110.98375818\a22=96.885408\a23=110.9820892\a31=105.06372853\a32=105.04904193\a33=116.83159997\d11=-123.58181434\d12=123.59566237\d13=93.90720306\d21=173.53636926\d22=56.42586401\d23=-60.68573257\d31=-122.12372655\d32=-238.02859382\d33=-0.06977574\\Version=DEC-AXP-OSF/1-G98RevA.7\HF=-50.4227784\S2=0.802379\S2-1=0.\S2A=0.751002\RMSD=7.821e-09\RMSF=3.192e-06\Dipole=0.1606631,0.0000744,0.4828966\PG=C01 [X(C1H9Ge1Si1)]\\@

# MP2/DZP

1\1\ MARCCENTRE-BNET2\FTS\UMP2-FC\Gen\C1H9Ge1Si1(2)\HIROSHI\09-Aug-2002\1\\#MP2/GEN PSEUDO=READ SCF=DIRECT OPT=(TS,EF,CALCFC) GEOM=CHECKPOINT GUESS=CHECK OPTCYC=100 DENSITY=CURRENT\\frontside attack of C-Si-Ge\\0,2\Si\C,1,r1\Ge,1,r2,2,a1\H,1,r11,2,a11,3,d11,0\H,1,r12,2,a12,3,d12,0\H,1,r13,3,a13,4,d13,0\H,2,r21,1,a21,4,d21,0\H,2,r22,1,a22,4,d22,0\H,2,r23,1,a23,4,d23,0\H,3,r31,1,a31,2,d31,0\H,3,r32,1,a32,2,d32,0\H,3,r33,1,a33,2,d33,0\\r1=2.21017838\r2=2.48504545\r11=1.47186135\r12=1.47185534\r13=1.50812774\r21=1.08832883\r22=1.08923139\r23=1.08831051\r31=1.53532933\r32=1.53394826\r33=1.53393577\a1=77.9657279\a11=88.09322648\a12=88.10603979\a13=87.81256026\a21=110.01102379\a22=96.49793077\a23=109.98473195\a31=110.22976841\a32=109.45393587\a33=109.50371628\d11=-122.94822482\d12=122.88403623\d13=99.85019667\d21=174.31496194\d22=57.13536436\d23=-60.04298758\d31=-179.91665782\d32=-300.20836744\d33=-59.59735098\\Version=DEC-AXP-OSF/1-G98RevA.7\HF=-50.424361\MP2=-50.776087\PUHF=-50.4300557\PMP2-0=-50.7800762\S2=0.788249\S2-1=0.765093\S2A=0.75069\RMSD=7.572e-09\RMSF=9.535e-06\Dipole=0.0273784,0.4216463,-0.0002072\PG=C01 [X(C1H9Ge1Si1)]\\@

## QCISD/DZP//MP2/DZP

QCISD=-50.8434742

**CCSD(T)/DZP//MP2/DZP**

CCSD(T)=-50.8535392

**B3LYP/DZP**

1\1\ MARCCENTRE-ANET02\FTS\UB3LYP\Gen\C1H9Ge1Si1(2)\HIROSHI\13-Aug-2002\1\\#B3LYP/GEN PSEUDO=READ SCF=DIRECT OPT=(TS,EF,CALCFC) GEOM=CHECKPOINT GUESS=CHECK OPTCYC=100 DENSITY=CURRENT\\frontside attack of C-Si-Ge\\0,2\Si\C,1,r1\Ge,1,r2,2,a1\H,1,r11,2,a11,3,d11,0\H,1,r12,2,a12,3,d12,0\H,1,r13,3,a13,4,d13,0\H,2,r21,1,a21,4,d21,0\H,2,r22,1,a22,4,d22,0\H,2,r23,1,a23,4,d23,0\H,3,r31,1,a31,2,d31,0\H,3,r32,1,a32,2,d32,0\H,3,r33,1,a33,2,d33,0\\r1=2.24624388\r2=2.48385413\r11=1.48152383\r12=1.48153476\r13=1.52305968\r21=1.08993757\r22=1.09070465\r23=1.08990903\r31=1.54455998\r32=1.54417465\r33=1.54413996\a1=80.88439096\a11=87.31519985\a12=87.30799078\a13=88.58206001\a21=108.27695921\a22=97.75001228\a23=108.23452631\a31=110.87314997\a32=109.69164263\a33=109.78456755\d11=-122.6419023\d12=122.62159896\d13=98.90056767\d21=175.43736888\d22=57.49918615\d23=-60.43757135\d31=-179.76616291\d32=-300.20772324\d33=-59.25874323\\Version=DEC-AXP-OSF/1-G98RevA.7\HF=-51.1049409\S2=0.758074\S2-1=0.\S2A=0.750035\RMSD=6.204e-09\RMSF=1.395e-05\Dipole=0.0206024,0.0002341,0.4211743\PG=C01 [X(C1H9Ge1Si1)]\\@

**Backside transition state 4 (Y = Si, Z = Sn)**

**UHF/DZP**

1\1\ MARCCENTRE-BNET2\PTS\UHF\Gen\C1H9Si1Sn1(2)\HIROSHI\06-Aug-2002\1\\#UHF/GEN PSEUDO=READ SCF=DIRECT OPT=(TS,EF,CALCFC) GEOM=CHECKPOINT GUESS=CHECK OPTCYC=100\\backside attack of C-Si-Sn\\0,2\Si\C,1,r1\H,1,r11,2,a11\H,1,r11,2,a11,3,d11,0\H,1,r11,2,a11,3,d12,0\Sn,1,r2,3,a2,4,d2,0\H,2,r21,1,a21,3,d21,0\H,2,r21,1,a21,4,d21,0\H,2,r21,1,a21,5,d21,0\H,6,r31,1,a31,3,d31,0\H,6,r31,1,a31,4,d31,0\H,6,r31,1,a31,5,d31,0\\r1=2.24247065\r2=2.79225548\r11=1.46471869\r21=1.07991005\r31=1.71180736\a11=88.4970066\a2=91.50178423\a21=104.79150995\a31=111.00717136\d11=120.00011602\d12=-119.99993983\d2=-92.59913421\d21=180.00001499\d31=179.99983737\\Version=DEC-AXP-OSF/1-G98RevA.7\HF=-50.0176566\S2=0.81365\S2-1=0.\S2A=0.751371\RMSD=4.562e-09\RMSF=2.527e-05\Dipole=-0.000005,0.0000085,0.7816543\PG=C01 [X(C1H9Si1Sn1)]\\@

**MP2/DZP**

1\1\ MARCCENTRE-ANET03\PTS\UMP2-FC\Gen\C1H9Si1Sn1(2)\HIROSHI\07-Aug-2002\1\\#MP2/GEN PSEUDO=READ SCF=DIRECT OPT=(TS,EF,CALCFC) GEOM=CHECKPOINT GUESS=CHECK OPTCYC=100 DENSITY=CURRENT\\backside attack of C-Si-Sn\\0,2\Si\C,1,r1\H,1,r11,2,a11\H,1,r11,2,a11,3,d11,0\H,1,r11,2,a11,3,d12,0\Sn,1,r2,3,a2,4,d2,0\H,2,r21,1,a21,3,d21,0\H,2,r21,1,a21,4,d21,0\H,2,r21,1,a21,5,d21,0\H,6,r31,1,a31,3,d31,0\H,6,r31,1,a31,4,d31,0\H,6,r31,1,a31,5,d31,0\\r1=2.28615894\r2=2.68245438\r11=1.46742298\r21=1.08701994\r31=1.70797441\a11=84.21004563\a2=95.79926743\a21=103.89066673\a31=111.08742431\d11=119.99879608\d12=-120.00025849\d2=-99.93091239\d21=180.00001308\d31=179.99986251\\Version=DEC-AXP-OSF/1-G98RevA.7\HF=-50.0208732\MP2=-50.3598487\PUHF=-50.0258615\PMP2-0=-50.3633447\S2=0.783687\S2-1=0.763317\S2A=0.750598\RMSD=1.196e-09\RMSF=5.775e-06\Dipole=0.0000269,-0.0000538,0.7018627\Polar=59.3516196,0.0000952,59.3517779,0.0111145,-0.0234122,174.2964545\PG=C01 [X(C1H9Si1Sn1)]\\@

**QCISD/DZP//MP2/DZP**

QCISD=-50.4283302

**CCSD(T)/DZP//MP2/DZP**

CCSD(T)=-50.4379263

**B3LYP/DZP**

1\1\ MARCCENTRE-ANET05\PTS\UB3LYP\Gen\C1H9Si1Sn1(2)\HIROSHI\10-Aug-2002\1\\#B3LYP/GEN PSEUDO=READ SCF=DIRECT OPT=(TS,EF,CALCFC) GEOM=CHECKPOINT GUESS=CHECK OPTCYC=100 DENSITY=CURRENT\\backside attack of C-Si-Sn\\0,2\Si\C,1,r1\H,1,r11,2,a11\H,1,r11,2,a11,3,d11,0\H,1,r11,2,a11,3,d12,0\Sn,1,r2,3,a2,4,d2,0\H,2,r21,1,a21,3,d21,0\H,2,r21,1,a21,4,d21,0\H,2,r21,1,a21,5,d21,0\H,6,r31,1,a31,3,d31,0\H,6,r31,1,a31,4,d31,0\H,6,r31,1,a31,5,d31,0\\r1=2.3913334\r2=2.69088618\r11=1.47363351\r21=1.08871363\r31=1.71771509\a11=82.25151089\a2=97.73495169\a21=102.56049747\a31=111.37287115\d11=120.00532448\d12=-120.00022435\d2=-103.12919684\d21=180.04358756\d31=180.20649689\\Version=DEC-AXP-OSF/1-G98RevA.7\HF=-50.698011\S2=0.757997\S2-1=0.\S2A=0.750031\RMSD=6.472e-09\RMSF=1.448e-05\Dipole=-0.0000504,0.000066,0.6858338\PG=C01 [X(C1H9Si1Sn1)]\\@

**Frontside transition state 5 (Y = Si, Z = Sn)**

**UHF/DZP**

1\1\ MARCCENTRE-ANET08\FTS\UHF\Gen\C1H9Si1Sn1(2)\HIROSHI\06-Aug-2002\1\\#UHF/GEN PSEUDO=READ SCF=DIRECT OPT=(TS,EF,CALCFC) GEOM=CHECKPOINT GUESS=CHECK OPTCYC=100\\frontside attack of C-Si-Sn\\0,2\Si\C,1,r1\Sn,1,r2,2,a1\H,1,r11,2,a11,3,d11,0\H,1,r12,2,a12,3,d12,0\H,1,r13,2,a13,3,d13,0\H,2,r21,1,a21,4,d21,0\H,2,r22,1,a22,4,d22,0\H,2,r23,1,a23,4,d23,0\H,3,r31,1,a31,2,d31,0\H,3,r32,1,a32,2,d32,0\H,3,r33,1,a33,2,d33,0\\r1=2.20877276\r2=2.7866713\r11=1.47253078\r12=1.47251743\r13=1.50017874\r21=1.08035883\r22=1.08182287\r23=1.0803674\r31=1.70574086\r32=1.70684512\r33=1.70573652\a1=77.20561702\a11=90.23669554\a12=90.25009595\a13=159.87153043\a21=111.31429094\a22=95.20157883\a23=111.33450286\a31=109.54166614\a32=109.87652186\a33=109.55964119\d11=236.36123908\d12=123.59789716\d13=-0.06004401\d21=-187.29154591\d22=56.33154268\d23=-60.04691831\d31=-59.78228602\d32=-180.02363947\d33=59.71861092\\Version=DEC-AXP-OSF/1-G98RevA.7\HF=-50.0158909\S2=0.807237\S2-1=0.\S2A=0.751019\RMSD=2.421e-09\RMSF=8.242e-06\Dipole=0.0723957,-0.0001167,0.4325526\PG=C01 [X(C1H9Si1Sn1)]\\@

**MP2/DZP**

1\1\ MARCCENTRE-ANET04\FTS\UMP2-FC\Gen\C1H9Si1Sn1(2)\HIROSHI\07-Aug-2002\1\\#MP2/GEN PSEUDO=READ SCF=DIRECT OPT=(TS,EF,CALCFC) GEOM=CHECKPOINT GUESS=CHECK OPTCYC=100 DENSITY=CURRENT\\frontside attack of C-Si-Sn\\0,2\Si\C,1,r1\Sn,1,r2,2,a1\H,1,r11,2,a11,3,d11,0\H,1,r12,2,a12,3,d12,0\H,1,r13,2,a13,3,d13,0\H,2,r21,1,a21,4,d21,0\H,2,r22,1,a22,4,d22,0\H,2,r23,1,a23,4,d23,0\H,3,r31,1,a31,2,d31,0\H,3,r32,1,a32,2,d32,0\H,3,r33,1,a33,2,d33,0\\r1=2.27192497\r2=2.65602508\r11=1.47073551\r12=1.47073851\r13=1.50256781\r21=1.08822294\r22=1.08835921\r23=1.08821888\r31=1.70275747\r32=1.70537782\r33=1.70276741\a1=76.81008974\a11=86.84568997\a12=86.83089925\a13=166.25664775\a21=110.35479895\a22=94.2955759\a23=110.3474514\a31=109.68102379\a32=110.02668575\a33=109.70063566\d11=237.02469936\d12=122.9862582\d13=0.06736278\d21=-186.33818034\d22=57.05432378\d23=-59.55438332\d31=-59.77035375\d32=-179.96489606\d33=59.82858005\\Version=DEC-AXP-OSF/1-G98RevA.7\HF=-50.0179637\MP2=-50.3595573\PUHF=-50.0234305\PMP2-0=-50.3634407\S2=0.788535\S2-1=0.765991\S2A=0.750646\RMSD=6.633e-10\RMSF=4.439e-06\Dipole=0.0650643,-0.0000597,0.3909692\Polar=93.9190839,-0.001751,57.793339,-7.7550907,0.0008396,81.762156\PG=C01 [X(C1H9Si1Sn1)]\\@

**QCISD/DZP//MP2/DZP**

QCISD=-50.4269404

**CCSD(T)/DZP//MP2/DZP**

CCSD(T)=-50.4366634

**B3LYP/DZP**

1\1\ MARCCENTRE-ANET03\FTS\UB3LYP\Gen\C1H9Si1Sn1(2)\HIROSHI\10-Aug-200 2\1\\#B3LYP/GEN PSEUDO=READ SCF=DIRECT OPT=(TS,EF,CALCFC) GEOM=CHECKPOINT GUESS=CHECK OPTCYC=100 DENSITY=CURRENT\\frontside attack of C-Si-Sn\\0,2\Si\C,1,r1\Sn,1,r2,2,a1\H,1,r11,2,a11,3,d11,0\H,1,r12,2,a12,3,d12,0\H,1,r13,2,a13,3,d13,0\H,2,r21,1,a21,4,d21,0\H,2,r22,1,a22,4,d22,0\H,2,r23,1,a23,4,d23,0\H,3,r31,1,a31,2,d31,0\H,3,r32,1,a32,2,d32,0\H,3,r33,1,a33,2,d33,0\\r1=2.32642025\r2=2.6595893\r11=1.47943042\r12=1.47943063\r13=1.51441655\r21=1.08965202\r22=1.08991581\r23=1.08965076\r31=1.7127931\r32=1.71493692\r33=1.71279366\a1=78.92170324\a11=85.92047182\a12=85.91959641\a13=168.98489606\a21=108.51253093\a22=95.05587708\a23=108.50800735\a31=110.01035408\a32=110.59270432\a33=110.00767289\d11=237.23131092\d12=122.76769151\d13=0.01468379\d21=-185.38950903\d22=57.24080572\d23=-60.12879367\d31=-59.63263873\d32=-179.98685786\d33=59.6609272\\Version=DEC-AXP-OSF/1-G98RevA.7\HF=-50.6948115\S2=0.758211\S2-1=0.\S2A=0.750033\RMSD=4.351e-09\RMSF=3.493e-05\Dipole=-0.0083053,0.0000227,0.3951066\PG=C01 [X(C1H9Si1Sn1)]\\@

**Backside transition state 4 (Y = Ge, Z = Si)**

**UHF/DZP**

1\1\ MARCCENTRE-BNET4\PTS\UHF\Gen\C1H9Ge1Si1(2)\HIROSHI\06-Aug-2002\1\\#UHF/GEN PSEUDO=READ SCF=DIRECT OPT=(TS,EF,CALCFC) GEOM=CHECKPOINT GUESS=CHECK OPTCYC=100\\backside attack of C-Ge-Si\\0,2\Ge\C,1,r1\H,1,r11,2,a11\H,1,r11,2,a11,3,d11,0\H,1,r11,2,a11,3,d12,0\Si,1,r2,3,a2,4,d2,0\H,2,r21,1,a21,3,d21,0\H,2,r21,1,a21,4,d21,0\H,2,r21,1,a21,5,d21,0\H,6,r31,1,a31,3,d31,0\H,6,r31,1,a31,4,d31,0\H,6,r31,1,a31,5,d31,0\\r1=2.26656602\r2=2.64305818\r11=1.5317946\r21=1.08044165\r31=1.47081889\a11=90.41111212\a2=89.58809283\a21=105.43625266\a31=109.73714291\d11=120.00015638\d12=-119.99992318\d2=-89.28663514\d21=180.00014019\d31=180.00340815\\Version=DEC-AXP-OSF/1-G98RevA.7\HF=-50.4193757\S2=0.822336\S2-1=0.\S2A=0.751957\RMSD=2.717e-09\RMSF=1.655e-05\Dipole=-0.0000012,0.000002,0.4210362\PG=C01 [X(C1H9Ge1Si1)]\\@

**MP2/DZP**

1\1\ MARCCENTRE-BNET4\PTS\UMP2-FC\Gen\C1H9Ge1Si1(2)\HIROSHI\08-Aug-2002\1\\#MP2/GEN PSEUDO=READ SCF=DIRECT OPT=(TS,EF,CALCFC) GEOM=CHECKPOINT GUESS=CHECK OPTCYC=100 DENSITY=CURRENT\\backside attack of C-Ge-Si\\0,2\Ge\C,1,r1\H,1,r11,2,a11\H,1,r11,2,a11,3,d11,0\H,1,r11,2,a11,3,d12,0\Si,1,r2,3,a2,4,d2,0\H,2,r21,1,a21,3,d21,0\H,2,r21,1,a21,4,d21,0\H,2,r21,1,a21,5,d21,0\H,6,r31,1,a31,3,d31,0\H,6,r31,1,a31,4,d31,0\H,6,r31,1,a31,5,d31,0\\r1=2.2699711\r2=2.52798502\r11=1.53569529\r21=1.08809208\r31=1.46943601\a11=86.69925402\a2=93.28387214\a21=104.92197466\a31=109.99890287\d11=120.0024516\d12=-119.99862086\d2=-95.66631554\d21=180.00001204\d31=180.00127928\\Version=DEC-AXP-OSF/1-G98RevA.7\HF=-50.4220024\MP2=-50.7728823\PUHF=-50.428193\PMP2-0=-50.777222\S2=0.793071\S2-1=0.76696\S2A=0.750998\RMSD=9.551e-09\RMSF=3.022e-05\Dipole=-0.4283332,-0.0000074,0.0000981\PG=C01 [X(C1H9Ge1Si1)]\\@

**QCISD/DZP//MP2/DZP**

QCISD=-50.8412957

**CCSD(T)/DZP//MP2/DZP**

CCSD(T)=-50.8514519

**B3LYP/DZP**

1\1\ MARCCENTRE-ANET02\PTS\UB3LYP\Gen\C1H9Ge1Si1(2)\HIROSHI\12-Aug-2002\1\\#B3LYP/GEN PSEUDO=READ SCF=DIRECT OPT=(TS,EF,CALCFC) GEOM=CHECKPOINT GUESS=CHECK OPTCYC=100 DENSITY=CURRENT\\backside attack of C-Ge-Si\\0,2\Ge\C,1,r1\H,1,r11,2,a11\H,1,r11,2,a11,3,d11,0\H,1,r11,2,a11,3,d12,0\Si,1,r2,3,a2,4,d2,0\H,2,r21,1,a21,3,d21,0\H,2,r21,1,a21,4,d21,0\H, 2,r21,1,a21,5,d21,0\H,6,r31,1,a31,3,d31,0\H,6,r31,1,a31,4,d31,0\H,6,r31,1,a31,5,d31,0\\r1=2.3147327\r2=2.5469887\r11=1.5439195\r21=1.09000981\r31=1.47934381\a11=86.00731024\a2=93.99588383\a21=104.36080607\a31=110.32149366\d11=119.99246641\d12=-120.00556876\d2=-96.87323552\d21=179.97617256\d31=179.98713308\\Version=DEC-AXP-OSF/1-G98RevA.7\HF=-51.1048155\S2=0.759346\S2-1=0.\S2A=0.750045\RMSD=2.471e-09\RMSF=6.877e-06\Dipole=0.0000135,0.0000225,0.4555006\PG=C01 [X(C1H9Ge1Si1)]\\@

**Frontside transition state 5 (Y = Ge, Z = Si)**

**UHF/DZP**

1\1\ MARCCENTRE-ANET03\FTS\UHF\Gen\C1H9Ge1Si1(2)\HIROSHI\06-Aug-2002\1\\#UHF/GEN PSEUDO=READ SCF=DIRECT OPT=(TS,EF,CALCFC) GEOM=CHECKPOINT G UESS=CHECK OPTCYC=100\\frontside attack of C-Ge-Si\\0,2\Ge\C,1,r1\Si,1,r2,2,a1\H,1,r11,2,a11,3,d11,0\H,1,r12,2,a12,3,d12,0\H,1,r13,3,a13,4,d13,0\H,2,r21,1,a21,4,d21,0\H,2,r22,1,a22,4,d22,0\H,2,r23,1,a23,4,d23,0\H,3,r31,1,a31,2,d31,0\H,3,r32,1,a32,2,d32,0\H,3,r33,1,a33,2,d33,0\\r1=2.22562653\r2=2.65862499\r11=1.53683193\r12=1.54324006\r13=1.57605672\r21=1.08103282\r22=1.08260179\r23=1.07950484\r31=1.46693293\r32=1.46718363\r33=1.46806726\a1=78.57094834\a11=96.28740257\a12=90.20421642\a13=76.61196246\a21=110.7003462\a22=97.57389843\a23=110.6275478\a31=116.29030388\a32=106.63641153\a33=102.73964034\d11=-116.68742764\d12=131.56459421\d13=97.74204871\d21=180.06220742\d22=63.07357082\d23=-54.47675262\d31=-22.33876848\d32=-146.09391445\d33=97.9312082\\Version=DEC-AXP-OSF/1-G98RevA.7\HF=-50.4180341\S2=0.818205\S2-1=0.\S2A=0.751526\RMSD=6.419e-09\RMSF=1.176e-06\Dipole=0.2223222,0.0156623,0.4670968\PG=C01 [X(C1H9Ge1Si1)]\\@

**MP2/DZP**

1\1\ MARCCENTRE-BNET4\FTS\UMP2-FC\Gen\C1H9Ge1Si1(2)\HIROSHI\09-Aug-2002\1\\#MP2/GEN PSEUDO=READ SCF=DIRECT OPT=(TS,EF,CALCFC) GEOM=CHECKPOINT GUESS=CHECK OPTCYC=100 DENSITY=CURRENT\\frontside attack of C-Ge-Si\ \0,2\Ge\C,1,r1\Si,1,r2,2,a1\H,1,r11,2,a11,3,d11,0\H,1,r12,2,a12,3,d12,0\H,1,r13,3,a13,4,d13,0\H,2,r21,1,a21,4,d21,0\H,2,r22,1,a22,4,d22,0\H,2,r23,1,a23,4,d23,0\H,3,r31,1,a31,2,d31,0\H,3,r32,1,a32,2,d32,0\H,3,r33,1,a33,2,d33,0\\r1=2.21561064\r2=2.50449923\r11=1.53665983\r12=1.5390838\r13=1.59392118\r21=1.08989651\r22=1.09062007\r23=1.08854342\r31=1.46579288\r32=1.46659455\r33=1.46813636\a1=78.21349887\a11=92.11304402\a12=90.25797832\a13=83.69153411\a21=110.85108863\a22=98.94642574\a23=109.18699148\a31=112.13909758\a32=110.42498877\a33=104.60551966\d11=-123.22869804\d12=123.21037344\d13=97.13176428\d21=181.06133584\d22=63.35511066\d23=-54.37760545\d31=-40.19596948\d32=-163.33912904\d33=78.57843231\\Version=DEC-AXP-OSF/1-G98RevA.7\HF=-50.4182509\MP2=-50.7716773\PUHF=-50.4252024\PMP2-0=-50.7766326\S2=0.800658\S2-1=0.771141\S2A=0.751234\RMSD=2.058e-09\RMSF=4.392e-06\Dipole=0.2120021,0.3659015,-0.0170813\PG=C01 [X(C1H9Ge1Si1)]\\@

**QCISD/DZP//MP2/DZP**

QCISD=-50.8388782

**CCSD(T)/DZP//MP2/DZP**

CCSD(T)=-50.8491714

**B3LYP/DZP**

1\1\ MARCCENTRE-ANET02\FTS\UB3LYP\Gen\C1H9Ge1Si1(2)\HIROSHI\12-Aug-2002\1\\#B3LYP/GEN PSEUDO=READ SCF=DIRECT OPT=(TS,EF,CALCFC) GEOM=CHECKPOINT GUESS=CHECK OPTCYC=100 DENSITY=CURRENT\\frontside attack of C-Ge-Si\\0,2\Ge\C,1,r1\Si,1,r2,2,a1\H,1,r11,2,a11,3,d11,0\H,1,r12,2,a12,3,d1 2,0\H,1,r13,3,a13,4,d13,0\H,2,r21,1,a21,4,d21,0\H,2,r22,1,a22,4,d22,0\H,2,r23,1,a23,4,d23,0\H,3,r31,1,a31,2,d31,0\H,3,r32,1,a32,2,d32,0\H,3,r33,1,a33,2,d33,0\\r1=2.21287964\r2=2.49899765\r11=1.54834654\r12=1.54838378\r13=1.6261726\r21=1.09063417\r22=1.09241326\r23=1.09063831\r31=1.47728349\r32=1.47601214\r33=1.47605934\a1=86.22617319\a11=92.02529155\a12=92.00178811\a13=79.15988313\a21=108.47653026\a22=100.88331483\a23=108.49096127\a31=114.79519181\a32=106.65066361\a33=106.71071573\d11=-122.80029513\d12=122.91671858\d13=90.04271388\d21=175.79561171\d22=57.15045552\d23=-61.49904977\d31=-0.11071311\d32=-121.61754719\d33=121.43125334\\Version=DEC-AXP-OSF/1-G98RevA.7\HF=-51.1012228\S2=0.760073\S2-1=0.\S2A=0.75006\RMSD=3.156e-09\RMSF=2.685e-05\Dipole=0.1290251,-0.0004188,0.3942787\PG=C01 [X(C1H9Ge1Si1)]\\@

**Backside transition state 4 (Y = Ge, Z = Ge)**

**UHF/DZP**

1\1\ MARCCENTRE-ANET02\PTS\UHF\Gen\C1H9Ge2(2)\HIROSHI\06-Aug-2002\1\\#UHF/GEN PSEUDO=READ SCF=DIRECT OPT=(TS,EF,CALCFC) GEOM=CHECKPOINT GUESS=CHECK OPTCYC=100\\backside attack of C-Ge-Ge\\0,2\Ge\C,1,r1\H,1,r11,2,a11\H,1,r11,2,a11,3,d11,0\H,1,r11,2,a11,3,d12,0\Ge,1,r2,3,a2,4,d2,0\H,2,r21,1,a21,3,d21,0\H,2,r21,1,a21,4,d21,0\H,2,r21,1,a21,5,d21,0\H,6,r31,1,a31,3,d31,0\H,6,r31,1,a31,4,d31,0\H,6,r31,1,a31,5,d31,0\\r1=2.28773382\r2=2.71537966\r11=1.52914096\r21=1.08010063\r31=1.53934453\a11=90.07359757\a2=89.92648709\a21=105.06053755\a31=110.20589939\d11=119.99996482\d12=-120.00001796\d2=-89.87267542\d21=179.99987843\d31=179.99999576\\Version=DEC-AXP-OSF/1-G98RevA.7\HF=-50.2932469\S2=0.82635\S2-1=0.\S2A=0.751965\RMSD=2.783e-09\RMSF=3.505e-06\Dipole=0.0000003,-0.0000005,0.5733828\PG=C01 [X(C1H9Ge2)]\\@

**MP2/DZP**

1\1\ MARCCENTRE-ANET06\PTS\UMP2-FC\Gen\C1H9Ge2(2)\HIROSHI\09-Aug-2002\1\\#MP2/GEN PSEUDO=READ SCF=DIRECT OPT=(TS,EF,CALCFC) GEOM=CHECKPOINTGUESS=CHECK OPTCYC=100 DENSITY=CURRENT\\backside attack of C-Ge-Ge\\0,2\Ge\C,1,r1\H,1,r11,2,a11\H,1,r11,2,a11,3,d11,0\H,1,r11,2,a11,3,d12,0\Ge,1,r2,3,a2,4,d2,0\H,2,r21,1,a21,3,d21,0\H,2,r21,1,a21,4,d21,0\H,2,r21,1,a21,5,d21,0\H,6,r31,1,a31,3,d31,0\H,6,r31,1,a31,4,d31,0\H,6,r31,1,a31,5,d31,0\\r1=2.29370647\r2=2.59803057\r11=1.5333173\r21=1.08770277\r31=1.53736492\a11=86.22580288\a2=93.76644564\a21=104.53666748\a31=110.49160164\d11=120.00099055\d12=-119.99937575\d2=-96.49299667\d21=180.00001508\d31=179.99999687\\Version=DEC-AXP-OSF/1-G98RevA.7\HF=-50.2959471\MP2=-50.6423746\PUHF=-50.301916\PMP2-0=-50.6465977\S2=0.793035\S2-1=0.767532\S2A=0.750946\RMSD=2.743e-09\RMSF=2.040e-05\Dipole=-0.5489623,-0.0000075,0.0000455\PG=C01 [X(C1H9Ge2)]\\@

**QCISD/DZP//MP2/DZP**

QCISD=-50.7104622

**CCSD(T)/DZP//MP2/DZP**

CCSD(T)=-50.7204578

**B3LYP/DZP**

1\1\ MARCCENTRE-BNET2\PTS\UB3LYP\Gen\C1H9Ge2(2)\HIROSHI\13-Aug-2002\1\\#B3LYP/GEN PSEUDO=READ SCF=DIRECT OPT=(TS,EF,CALCFC) GEOM=CHECKPOINTGUESS=CHECK OPTCYC=100 DENSITY=CURRENT\\backside attack of C-Ge-Ge\\0,2\Ge\C,1,r1\H,1,r11,2,a11\H,1,r11,2,a11,3,d11,0\H,1,r11,2,a11,3,d12,0\Ge,1,r2,3,a2,4,d2,0\H,2,r21,1,a21,3,d21,0\H,2,r21,1,a21,4,d21,0\H,2,r21,1,a21,5,d21,0\H,6,r31,1,a31,3,d31,0\H,6,r31,1,a31,4,d31,0\H,6,r31,1,a31,5,d31,0\\r1=2.35673932\r2=2.61140517\r11=1.5409517\r21=1.08951725\r31=1.54791505\a11=84.95230103\a2=95.03883542\a21=103.72045081\a31=110.85557431\d11=120.00236045\d12=-119.9968631\d2=-98.66183004\d21=180.00027176\d31=179.98396811\\Version=DEC-AXP-OSF/1-G98RevA.7\HF=-50.983231\S2=0.759409\S2-1=0.\S2A=0.750042\RMSD=3.506e-09\RMSF=4.740e-06\Dipole=-0.0000396,-0.0000038,0.5679525\PG=C01 [X(C1H9Ge2)]\\@

**Frontside transition state 5 (Y = Ge, Z = Ge)**

**UHF/DZP**

1\1\ MARCCENTRE-ANET04\FTS\UHF\Gen\C1H9Ge2(2)\HIROSHI\06-Aug-2002\1\\#UHF/GEN PSEUDO=READ SCF=DIRECT OPT=(TS,EF,CALCFC) GEOM=CHECKPOINT GUESS=CHECK OPTCYC=100\\frontside attack of C-Ge-Ge\\0,2\Ge\C,1,r1\Ge,1,r2,2,a1\H,1,r11,2,a11,3,d11,0\H,1,r12,2,a12,3,d12,0\H,1,r13,3,a13,4,d13,0\H,2,r21,1,a21,4,d21,0\H,2,r22,1,a22,4,d22,0\H,2,r23,1,a23,4,d23,0\H,3,r31,1,a31,2,d31,0\H,3,r32,1,a32,2,d32,0\H,3,r33,1,a33,2,d33,0\\r1=2.25480906\r2=2.73472477\r11=1.53732458\r12=1.54116673\r13=1.57041613\r21=1.08041664\r22=1.08219087\r23=1.07921835\r31=1.53497285\r32=1.53524936\r33=1.53603781\a1=78.27631555\a11=94.16791538\a12=90.07563851\a13=77.32573468\a21=110.56213099\a22=96.46035233\a23=110.42091337\a31=116.59523036\a32=106.35501986\a33=103.50582073\d11=-119.36309831\d12=128.78445361\d13=97.58811382\d21=177.64648025\d22=60.70430662\d23=-56.63953603\d31=-18.05231091\d32=-141.53121154\d33=102.63386186\\Version=DEC-AXP-OSF/1-G98RevA.7\HF=-50.2916423\S2=0.825348\S2-1=0.\S2A=0.751524\RMSD=3.720e-09\RMSF=5.789e-06\Dipole=0.1397378,0.0184979,0.4715656\PG=C01[X(C1H9Ge2)]\\@

**MP2/DZP**

1\1\ MARCCENTRE-ANET05\FTS\UMP2-FC\Gen\C1H9Ge2(2)\HIROSHI\10-Aug-2002\1\\#MP2/GEN PSEUDO=READ SCF=DIRECT OPT=(TS,EF,CALCFC) GEOM=CHECKPOINT GUESS=CHECK OPTCYC=100 DENSITY=CURRENT\\frontside attack of C-Ge-Ge\\0,2\Ge\C,1,r1\Ge,1,r2,2,a1\H,1,r11,2,a11,3,d11,0\H,1,r12,2,a12,3,d12,0\H,1,r13,3,a13,4,d13,0\H,2,r21,1,a21,4,d21,0\H,2,r22,1,a22,4,d22,0\H,2,r23,1,a23,4,d23,0\H,3,r31,1,a31,2,d31,0\H,3,r32,1,a32,2,d32,0\H,3,r33,1,a33,2,d33,0\\r1=2.25000165\r2=2.58645614\r11=1.53773198\r12=1.53756933\r13=1.5820992\r21=1.0884992\r22=1.09002894\r23=1.08886034\r31=1.53394666\r32=1.53494355\r33=1.5333827\a1=76.6582861\a11=89.84603053\a12=89.87174402\a13=85.48026874\a21=109.77997086\a22=97.253495\a23=110.4522383\a31=108.12561376\a32=110.1072616\a33=109.70091098\d11=-122.99384407\d12=123.69806111\d13=98.71149923\d21=172.16625417\d22=54.90965878\d23=-62.40436894\d31=-63.60243341\d32=-183.46753382\d33=55.59128521\\Version=DEC-AXP-OSF/1-G98RevA.7\HF=-50.292089\MP2=-50.6409178\PUHF=-50.2987531\PMP2-0=-50.6457435\S2=0.801293\S2-1=0.772623\S2A=0.751127\RMSD=7.425e-09\RMSF=4.829e-06\Dipole=-0.1745261,0.3668866,-0.0052397\PG=C01[X(C1H9Ge2)]\\@

**QCISD/DZP//MP2/DZP**

QCISD=-50.7078271

**CCSD(T)/DZP//MP2/DZP**

CCSD(T)=-50.7179547

**B3LYP/DZP**

1\1\ MARCCENTRE-BNET2\FTS\UB3LYP\Gen\C1H9Ge2(2)\HIROSHI\15-Aug-2002\1\\#B3LYP/GEN PSEUDO=READ SCF=DIRECT OPT=(TS,EF,CALCFC) GEOM=CHECKPOINTGUESS=CHECK OPTCYC=100 DENSITY=CURRENT\\frontside attack of C-Ge-Ge\\0,2\Ge\C,1,r1\Ge,1,r2,2,a1\H,1,r11,2,a11,3,d11,0\H,1,r12,2,a12,3,d12,0\H,1,r13,3,a13,4,d13,0\H,2,r21,1,a21,4,d21,0\H,2,r22,1,a22,4,d22,0\H,2,r23,1,a23,4,d23,0\H,3,r31,1,a31,2,d31,0\H,3,r32,1,a32,2,d32,0\H,3,r33,1,a33,2,d33,0\\r1=2.27676304\r2=2.57626018\r11=1.54737471\r12=1.54737301\r13=1.60488474\r21=1.08987852\r22=1.09146068\r23=1.08987804\r31=1.54427968\r32=1.54410012\r33=1.54410236\a1=83.66228788\a11=89.63117766\a12=89.63031156\a13=82.08406\a21=108.14236816\a22=98.71321382\a23=108.1430665\a31=115.3963107\a32=106.72301802\a33=106.73064403\d11=-123.05575939\d12=123.05318955\d13=94.5420189\d21=175.29671345\d22=56.94580797\d23=-61.40539042\d31=-0.00045313\d32=-121.75496622\d33=121.7601585\\Version=DEC-AXP-OSF/1-G98RevA.7\HF=-50.9789524\S2=0.759989\S2-1=0.\S2A=0.750054\RMSD=7.736e-09\RMSF=1.629e-05\Dipole=0.0790665,-0.0000204,0.4208795\PG=C01 [X(C1H9Ge2)]\\@

**Backside transition state 4 (Y = Ge, Z = Sn)**

**UHF/DZP**

1\1\ MARCCENTRE-ANET02\PTS\UHF\Gen\C1H9Ge1Sn1(2)\HIROSHI\12-Aug-2002\1\\#UHF/GEN PSEUDO=READ SCF=DIRECT OPT=(TS,EF,CALCFC) GEOM=CHECKPOINT GUESS=CHECK OPTCYC=100\\backside attack of C-Ge-Sn\\0,2\Ge\C,1,r1\H,1,r11,2,a11\H,1,r11,2,a11,3,d11,0\H,1,r11,2,a11,3,d12,0\Sn,1,r2,3,a2,4,d2,0\H,2,r21,1,a21,3,d21,0\H,2,r21,1,a21,4,d21,0\H,2,r21,1,a21,5,d21,0\H,6,r31,1,a31,3,d31,0\H,6,r31,1,a31,4,d31,0\H,6,r31,1,a31,5,d31,0\\r1=2.32093424\r2=2.90412559\r11=1.52624939\r21=1.07972494\r31=1.71167315\a11=89.55135695\a2=90.44284787\a21=104.58151964\a31=110.95745163\d11=120.00058464\d12=-119.99978638\d2=-90.76600093\d21=179.99997265\d31=180.00007242\\Version=DEC-AXP-OSF/1-G98RevA.7\HF=-49.8875353\S2=0.83062\S2-1=0.\S2A=0.751969\RMSD=6.403e-09\RMSF=4.984e-06\Dipole=-0.0000329,0.0000621,0.7691063\PG=C01 [X(C1H9Ge1Sn1)]\\@

**MP2/DZP**

1\1\ MARCCENTRE-ANET04\PTS\UMP2-FC\Gen\C1H9Ge1Sn1(2)\HIROSHI\07-Aug-2002\1\\#MP2/GEN PSEUDO=READ SCF=DIRECT OPT=(TS,EF,CALCFC) GEOM=CHECKPOINT GUESS=CHECK OPTCYC=100 DENSITY=CURRENT\\backside attack of C-Ge-Sn\\0,2\Ge\C,1,r1\H,1,r11,2,a11\H,1,r11,2,a11,3,d11,0\H,1,r11,2,a11,3,d12,0\Sn,1,r2,3,a2,4,d2,0\H,2,r21,1,a21,3,d21,0\H,2,r21,1,a21,4,d21,0\H,2,r21,1,a21,5,d21,0\H,6,r31,1,a31,3,d31,0\H,6,r31,1,a31,4,d31,0\H,6,r31,1,a31,5,d31,0\\r1=2.33095875\r2=2.77726397\r11=1.53086803\r21=1.08727791\r31=1.70800862\a11=85.39407129\a2=94.6036266\a21=104.08159209\a31=110.97824722\d11=119.99995811\d12=-119.99997221\d2=-97.91595726\d21=180.00001224\d31=180.00015882\\Version=DEC-AXP-OSF/1-G98RevA.7\HF=-49.890152\MP2=-50.2264573\PUHF=-49.8958578\PMP2-0=-50.2305368\S2=0.792788\S2-1=0.768093\S2A=0.750894\RMSD=7.463e-09\RMSF=3.693e-06\Dipole=-0.6512676,0.0000144,-0.0000073\PG=C01 [X(C1H9Ge1Sn1)]\\@

**QCISD/DZP//MP2/DZP**

QCISD=-50.2945885

**CCSD(T)/DZP//MP2/DZP**

CCSD(T)=-50.3042728

**B3LYP/DZP**

1\1\ MARCCENTRE-ANET02\PTS\UB3LYP\Gen\C1H9Ge1Sn1(2)\HIROSHI\12-Aug-2002\1\\#B3LYP/GEN PSEUDO=READ SCF=DIRECT OPT=(TS,EF,CALCFC) GEOM=CHECKPOINT GUESS=CHECK OPTCYC=100 DENSITY=CURRENT\\backside attack of C-Ge-Sn\\0,2\Ge\C,1,r1\H,1,r11,2,a11\H,1,r11,2,a11,3,d11,0\H,1,r11,2,a11,3,d12,0\Sn,1,r2,3,a2,4,d2,0\H,2,r21,1,a21,3,d21,0\H,2,r21,1,a21,4,d21,0\H,2,r21,1,a21,5,d21,0\H,6,r31,1,a31,3,d31,0\H,6,r31,1,a31,4,d31,0\H,6,r31,1,a31,5,d31,0\\r1=2.4131447\r2=2.78853434\r11=1.53791138\r21=1.08900412\r31=1.71831067\a11=83.62890991\a2=96.35399483\a21=103.01605594\a31=111.34474601\d11=120.00135884\d12=-120.00285707\d2=-100.86878187\d21=180.04183785\d31=180.13910032\\Version=DEC-AXP-OSF/1-G98RevA.7\HF=-50.5741126\S2=0.759561\S2-1=0.\S2A=0.75004\RMSD=4.817e-09\RMSF=1.479e-05Dipole=-0.0000813,0.0000601,0.6653313\PG=C01 [X(C1H9Ge1Sn1)]\\@

**Frontside transition state 5 (Y = Ge, Z = Sn)**

**UHF/DZP**

1\1\ MARCCENTRE-ANET02\FTS\UHF\Gen\C1H9Ge1Sn1(2)\HIROSHI\06-Aug-2002\1\\#UHF/GEN PSEUDO=READ SCF=DIRECT OPT=(TS,EF,CALCFC) GEOM=CHECKPOINT GUESS=CHECK OPTCYC=100\\frontside attack of C-Ge-Sn\\0,2\Ge\C,1,r1\Sn,1,r2,2,a1\H,1,r11,2,a11,3,d11,0\H,1,r12,2,a12,3,d12,0\H,1,r13,2,a13,3,d13,0\H,2,r21,1,a21,4,d21,0\H,2,r22,1,a22,4,d22,0\H,2,r23,1,a23,4,d23,0\H,3,r31,1,a31,2,d31,0\H,3,r32,1,a32,2,d32,0\H,3,r33,1,a33,2,d33,0\\r1=2.28452178\r2=2.9243038\r11=1.53879005\r12=1.53880216\r13=1.56453858\r21=1.07996605\r22=1.08172006\r23=1.07995765\r31=1.70651524\r32=1.70763823\r33=1.70652066\a1=75.28965118\a11=90.95752452\a12=90.95240374\a13=156.53904329\a21=110.85595656\a22=95.08475903\a23=110.8584344\a31=109.38764274\a32=110.06971079\a33=109.35558824\d11=-123.96796594\d12=123.96466279\d13=0.01336556\d21=172.56195013\d22=56.03545675\d23=-60.49345983\d31=-59.55892741\d32=-179.94040752\d33=59.6986172\\Version=DEC-AXP-OSF/1-G98RevA.7\HF=-49.8861716\S2=0.83031\S2-1=0.\S2A=0.751509\RMSD=7.945e-09\RMSF=2.645e-06\Dipole=0.039991,0.0001479,0.4098324\PG=C01 [X(C1H9Ge1Sn1)]\\@

**MP2/DZP**

1\1\ MARCCENTRE-ANET02\FTS\UMP2-FC\Gen\C1H9Ge1Sn1(2)\HIROSHI\07-Aug-2002\1\\#MP2/GEN PSEUDO=READ SCF=DIRECT OPT=(TS,EF,CALCFC) GEOM=CHECKPOINT GUESS=CHECK OPTCYC=100 DENSITY=CURRENT\\frontside attack of C-Ge-Sn\\0,2\Ge\C,1,r1\Sn,1,r2,2,a1\H,1,r11,2,a11,3,d11,0\H,1,r12,2,a12,3,d12,0\H,1,r13,2,a13,3,d13,0\H,2,r21,1,a21,4,d21,0\H,2,r22,1,a22,4,d22,0\H,2,r23,1,a23,4,d23,0\H,3,r31,1,a31,2,d31,0\H,3,r32,1,a32,2,d32,0\H,3,r33,1,a33,2,d33,0\\r1=2.30191205\r2=2.75149216\r11=1.53681657\r12=1.536814\r13=1.57692832\r21=1.08862132\r22=1.0893168\r23=1.08863747\r31=1.70270003\r32=1.70524909\r33=1.70269102\a1=75.66720703\a11=88.60179581\a12=88.5948288\a13=162.9777822\a21=110.45128474\a22=95.29500975\a23=110.48045338\a31=109.21724343\a32=110.0709701\a33=109.2719578\d11=-123.40152169\d12=123.45916957\d13=0.04217058\d21=173.24566539\d22=56.51161236\d23=-60.2229391\d31=-59.77348488\d32=-180.05552351\d33=59.6254265\\Version=DEC-AXP-OSF/1-G98RevA.7\HF=-49.8872487\MP2=-50.226092\PUHF=-49.8935614\PMP2-0=-50.2307124\S2=0.800718\S2-1=0.773203\S2A=0.75101\RMSD=9.427e-09\RMSF=4.775e-06\Dipole=-0.1571005,0.3476652,-0.000348\PG=C01[X(C1H9Ge1Sn1)]\\@

**QCISD/DZP//MP2/DZP**

QCISD=-50.2929858

**CCSD(T)/DZP//MP2/DZP**

CCSD(T)=-50.3027743

**B3LYP/DZP**

1\1\ MARCCENTRE-BNET2\FTS\UB3LYP\Gen\C1H9Ge1Sn1(2)\HIROSHI\12-Aug-2002\1\\#B3LYP/GEN PSEUDO=READ SCF=DIRECT OPT=(TS,EF,CALCFC) GEOM=CHECKPOINT GUESS=CHECK OPTCYC=100 DENSITY=CURRENT\\frontside attack of C-Ge-Sn\\0,2\Ge\C,1,r1\Sn,1,r2,2,a1\H,1,r11,2,a11,3,d11,0\H,1,r12,2,a12,3,d12,0\H,1,r13,2,a13,3,d13,0\H,2,r21,1,a21,4,d21,0\H,2,r22,1,a22,4,d22,0\H,2,r23,1,a23,4,d23,0\H,3,r31,1,a31,2,d31,0\H,3,r32,1,a32,2,d32,0\H,3,r33,1,a33,2,d33,0\\r1=2.33567713\r2=2.76000875\r11=1.54623051\r12=1.54622409\r13=1.59122768\r21=1.0899155\r22=1.09072957\r23=1.08988926\r31=1.71330242\r32=1.71484652\r33=1.71332589\a1=78.45884658\a11=88.11533698\a12=88.13327265\a13=165.60369082\a21=108.83776602\a22=96.18467616\a23=108.76818479\a31=109.67897401\a32=110.64231783\a33=109.62427239\d11=-123.29235177\d12=123.25807133\d13=-0.0571272\d21=174.31665287\d22=56.87318957\d23=-60.56421035\d31=-59.33066413\d32=-179.81353329\d33=59.74166194\\Version=DEC-AXP-OSF/1-G98RevA.7\HF=-50.5705638\S2=0.760227\S2-1=0.\S2A=0.750051\RMSD=4.436e-09\RMSF=5.265e-06\Dipole=0.0403817,0.0001954,0.3766246\PG=C01 [X(C1H9Ge1Sn1)]\\@

**Backside transition state 4 (Y = Sn, Z = Si)**

**UHF/DZP**

1\1\ MARCCENTRE-ANET07\PTS\UHF\Gen\C1H9Si1Sn1(2)\HIROSHI\06-Aug-2002\1\\#UHF/GEN PSEUDO=READ SCF=DIRECT OPT=(TS,EF,CALCFC) GEOM=CHECKPOINT GUESS=CHECK OPTCYC=100\\backside attack of C-Sn-Si\\0,2\Sn\C,1,r1\H,1,r11,2,a11\H,1,r11,2,a11,3,d11,0\H,1,r11,2,a11,3,d12,0\Si,1,r2,3,a2,4,d2,0\H,2,r21,1,a21,3,d21,0\H,2,r21,1,a21,4,d21,0\H,2,r21,1,a21,5,d21,0\H,6,r31,1,a31,3,d31,0\H,6,r31,1,a31,4,d31,0\H,6,r31,1,a31,5,d31,0\\r1=2.4078208\r2=2.82390392\r11=1.70281716\r21=1.08021876\r31=1.4700419\a11=90.9140313\a2=89.08357231\a21=105.27884417\a31=109.45649339\d11=120.00013286\d12=-119.99993993\d2=-88.41318158\d21=180.03918008\d31=180.00685951\\Version=DEC-AXP-OSF/1-G98RevA.7\HF=-50.0113987\S2=0.83815\S2-1=0.\S2A=0.753297\RMSD=7.511e-09\RMSF=7.388e-06\Dipole=-0.0000054,0.0000095,0.3946526\PG=C01 [X(C1H9Si1Sn1)]\\@

**MP2/DZP**

1\1\ MARCCENTRE-BNET4\PTS\UMP2-FC\Gen\C1H9Si1Sn1(2)\HIROSHI\09-Aug-2002\1\\#MP2/GEN PSEUDO=READ SCF=DIRECT OPT=(TS,EF,CALCFC) GEOM=CHECKPOINT GUESS=CHECK OPTCYC=100 DENSITY=CURRENT\\backside attack of C-Sn-Si\\0,2\Sn\C,1,r1\H,1,r11,2,a11\H,1,r11,2,a11,3,d11,0\H,1,r11,2,a11,3,d12,0\Si,1,r2,3,a2,4,d2,0\H,2,r21,1,a21,3,d21,0\H,2,r21,1,a21,4,d21,0\H,2,r21,1,a21,5,d21,0\H,6,r31,1,a31,3,d31,0\H,6,r31,1,a31,4,d31,0\H,6,r31,1,a31,5,d31,0\\r1=2.39029345\r2=2.70924718\r11=1.70624066\r21=1.08811718\r31=1.46880255\a11=87.54281947\a2=92.45957724\a21=105.02775436\a31=109.78297142\d11=119.99839051\d12=-120.00075457\d2=-94.25613442\d21=180.06895788\d31=180.003548\\Version=DEC-AXP-OSF/1-G98RevA.7\HF=-50.0140016\MP2=-50.3549584\PUHF=-50.0205387\PMP2-0=-50.3596566\S2=0.800882\S2-1=0.771745\S2A=0.751526\RMSD=2.368e-09\RMSF=2.608e-05\Dipole=-0.428695,0.0000278,0.000003\PG=C01 [X(C1H9Si1Sn1)]\\@

**QCISD/DZP//MP2/DZP**

QCISD=-50.4243992

**CCSD(T)/DZP//MP2/DZP**

CCSD(T)=-50.4344416

**B3LYP/DZP**

1\1\ MARCCENTRE-BNET4\PTS\UB3LYP\Gen\C1H9Si1Sn1(2)\HIROSHI\13-Aug-2002\1\\#B3LYP/GEN PSEUDO=READ SCF=DIRECT OPT=(TS,EF,CALCFC) GEOM=CHECKPOINT GUESS=CHECK OPTCYC=100 DENSITY=CURRENT\\backside attack of C-Sn-Si\\0,2\Sn\C,1,r1\H,1,r11,2,a11\H,1,r11,2,a11,3,d11,0\H,1,r11,2,a11,3,d12,0\Si,1,r2,3,a2,4,d2,0\H,2,r21,1,a21,3,d21,0\H,2,r21,1,a21,4,d21,0\H,2,r21,1,a21,5,d21,0\H,6,r31,1,a31,3,d31,0\H,6,r31,1,a31,4,d31,0\H,6,r31,1,a31,5,d31,0\\r1=2.43387388\r2=2.72061216\r11=1.71543456\r21=1.08987266\r31=1.47897447\a11=86.25439863\a2=93.74389821\a21=104.26241468\a31=110.22915212\d11=120.00034386\d12=-119.99992348\d2=-96.46114248\d21=179.8611923\d31=179.95104524\\Version=DEC-AXP-OSF/1-G98RevA.7\HF=-50.6974687\S2=0.760615\S2-1=0.\S2A=0.750064\RMSD=4.137e-09\RMSF=4.128e-06\Dipole=0.0000175,-0.0000469,0.4753419\PG=C01 [X(C1H9Si1Sn1)]\\@

**Frontside transition state 5 (Y = Sn, Z = Si)**

**UHF/DZP**

1\1\ MARCCENTRE-BNET4\FTS\UHF\Gen\C1H9Si1Sn1(2)\HIROSHI\07-Aug-2002\1\\#UHF/GEN PSEUDO=READ SCF=DIRECT OPT=(TS,EF,CALCFC) GEOM=CHECKPOINT GUESS=CHECK OPTCYC=100\\frontside attack of C-Sn-Si\\0,2\Sn\C,1,r1\Si,1,r2,2,a1\H,1,r11,2,a11,3,d11,0\H,1,r12,2,a12,3,d12,0\H,1,r13,3,a13,4,d13,0\H,2,r21,1,a21,4,d21,0\H,2,r22,1,a22,4,d22,0\H,2,r23,1,a23,4,d23,0\H,3,r31,1,a31,2,d31,0\H,3,r32,1,a32,2,d32,0\H,3,r33,1,a33,2,d33,0\\r1=2.43435533\r2=2.85918356\r11=1.70613418\r12=1.71836976\r13=1.72555756\r21=1.07994214\r22=1.08136001\r23=1.07843535\r31=1.46722463\r32=1.46882296\r33=1.46770436\a1=72.66675068\a11=104.14442658\a12=84.64354881\a13=82.94286732\a21=105.85663332\a22=95.68529491\a23=114.49890877\a31=111.22197046\a32=107.32644345\a33=107.62046149\d11=-100.75317165\d12=151.17076603\d13=106.71348521\d21=174.79345708\d22=59.05122066\d23=-59.44083444\d31=-57.49026013\d32=-178.24280066\d33=63.08974823\\Version=DEC-AXP-OSF/1-G98RevA.7\HF=-50.0163981\S2=0.840585\S2-1=0.\S2A=0.751758\RMSD=7.395e-09\RMSF=6.769e-06\Dipole=0.2254718,0.0075396,0.5604766\PG=C01 [X(C1H9Si1Sn1)]\\@

**MP2/DZP**

1\1\ MARCCENTRE-BNET4\FTS\UMP2-FC\Gen\C1H9Si1Sn1(2)\HIROSHI\09-Aug-2002\1\\#MP2/GEN PSEUDO=READ SCF=DIRECT OPT=(TS,EF,CALCFC) GEOM=CHECKPOINT GUESS=CHECK OPTCYC=100 DENSITY=CURRENT\\frontside attack of C-Sn-Si\\0,2\Sn\C,1,r1\Si,1,r2,2,a1\H,1,r11,2,a11,3,d11,0\H,1,r12,2,a12,3,d12,0\H,1,r13,3,a13,4,d13,0\H,2,r21,1,a21,4,d21,0\H,2,r22,1,a22,4,d22,0\H,2,r23,1,a23,4,d23,0\H,3,r31,1,a31,2,d31,0\H,3,r32,1,a32,2,d32,0\H,3,r33,1,a33,2,d33,0\\r1=2.37725568\r2=2.72791418\r11=1.70653059\r12=1.70607509\r13=1.74158286\r21=1.08826093\r22=1.09103593\r23=1.08893577\r31=1.46722153\r32=1.46735683\r33=1.46565585\a1=72.09693603\a11=91.15620857\a12=90.96286485\a13=84.57465987\a21=109.29426436\a22=96.7981915\a23=112.21834325\a31=106.33662858\a32=109.65766421\a33=110.64712316\d11=-122.67678311\d12=124.5209739\d13=100.12367653\d21=166.61774813\d22=49.8059088\d23=-67.43200909\d31=-70.28971073\d32=-189.18481836\d33=49.0118676\\Version=DEC-AXP-OSF/1-G98RevA.7\HF=-50.0162086\MP2=-50.3579679\PUHF=-50.0233992\PMP2-0=-50.3632628\S2=0.810555\S2-1=0.778205\S2A=0.751342\RMSD=5.613e-09\RMSF=1.941e-06\Dipole=-0.3511871,0.3481179,-0.0124929\PG=C01 [X(C1H9Si1Sn1)]\\@

**QCISD/DZP//MP2/DZP**

QCISD=-50.4257667

**CCSD(T)/DZP//MP2/DZP**

CCSD(T)=-50.4356428

**B3LYP/DZP**

1\1\ MARCCENTRE-BNET2\FTS\UB3LYP\Gen\C1H9Si1Sn1(2)\HIROSHI\13-Aug-2002\1\\#B3LYP/GEN PSEUDO=READ SCF=DIRECT OPT=(TS,EF,CALCFC) GEOM=CHECKPOINT GUESS=CHECK OPTCYC=100 DENSITY=CURRENT\\frontside attack of C-Sn-Si\\0,2\Sn\C,1,r1\Si,1,r2,2,a1\H,1,r11,2,a11,3,d11,0\H,1,r12,2,a12,3,d12,0\H,1,r13,3,a13,4,d13,0\H,2,r21,1,a21,4,d21,0\H,2,r22,1,a22,4,d22,0\H,2,r23,1,a23,4,d23,0\H,3,r31,1,a31,2,d31,0\H,3,r32,1,a32,2,d32,0\H,3,r33,1,a33,2,d33,0\\r1=2.37383542\r2=2.71430692\r11=1.71687999\r12=1.71680308\r13=1.77274755\r21=1.08988698\r22=1.09227235\r23=1.089901\r31=1.47645072\r32=1.47644377\r33=1.47626042\a1=81.16028567\a11=91.59540638\a12=91.64605734\a13=79.86640603\a21=108.34525753\a22=99.60809697\a23=108.37268126\a31=106.40943345\a32=106.4630627\a33=114.68811585\d11=-123.32079627\d12=123.24682515\d13=93.82885736\d21=175.05875789\d22=56.60596757\d23=-61.84634186\d31=-121.2434424\d32=-238.03487485\d33=0.34209312\\Version=DEC-AXP-OSF/1-G98RevA.7\HF=-50.6956221\S2=0.761972\S2-1=0.\S2A=0.75008\RMSD=2.832e-09\RMSF=4.542e-06\Dipole=0.1750537,-0.0001524,0.4787542\PG=C01 [X(C1H9Si1Sn1)]\\@

**Backside transition state 4 (Y = Sn, Z = Ge)**

**UHF/DZP**

1\1\ MARCCENTRE-ANET06\PTS\UHF\Gen\C1H9Ge1Sn1(2)\HIROSHI\06-Aug-2002\1\\#UHF/GEN PSEUDO=READ SCF=DIRECT OPT=(TS,EF,CALCFC) GEOM=CHECKPOINT GUESS=CHECK OPTCYC=100\\backside attack of C-Sn-Ge\\0,2\Sn\C,1,r1\H,1,r11,2,a11\H,1,r11,2,a11,3,d11,0\H,1,r11,2,a11,3,d12,0\Ge,1,r2,3,a2,4,d2,0\H,2,r21,1,a21,3,d21,0\H,2,r21,1,a21,4,d21,0\H,2,r21,1,a21,5,d21,0\H,6,r31,1,a31,3,d31,0\H,6,r31,1,a31,4,d31,0\H,6,r31,1,a31,5,d31,0\\r1=2.42197283\r2=2.89235939\r11=1.70058894\r21=1.07998465\r31=1.53848729\a11=90.71075465\a2=89.29064102\a21=104.99978927\a31=109.92209301\d11=119.99966067\d12=-120.00016791\d2=-88.7715913\d21=180.04004066\d31=179.99932643\\Version=DEC-AXP-OSF/1-G98RevA.7\HF=-49.8859853\S2=0.8402\S2-1=0.\S2A=0.7532\RMSD=5.253e-09\RMSF=6.221e-06\Dipole=0.000005,-0.0000088,0.5343286\PG=C01 [X(C1H9Ge1Sn1)]\\@

**MP2/DZP**

1\1\ MARCCENTRE-BNET2\PTS\UMP2-FC\Gen\C1H9Ge1Sn1(2)\HIROSHI\10-Aug-2002\1\\#MP2/GEN PSEUDO=READ SCF=DIRECT OPT=(TS,EF,CALCFC) GEOM=CHECKPOINT GUESS=CHECK OPTCYC=100 DENSITY=CURRENT\\backside attack of C-Sn-Ge\\0,2\Sn\C,1,r1\H,1,r11,2,a11\H,1,r11,2,a11,3,d11,0\H,1,r11,2,a11,3,d12,0\Ge,1,r2,3,a2,4,d2,0\H,2,r21,1,a21,3,d21,0\H,2,r21,1,a21,4,d21,0\H,2,r21,1,a21,5,d21,0\H,6,r31,1,a31,3,d31,0\H,6,r31,1,a31,4,d31,0\H,6,r31,1,a31,5,d31,0\\r1=2.40606535\r2=2.77830756\r11=1.70417048\r21=1.08782286\r31=1.53678111\a11=87.20926959\a2=92.77783794\a21=104.7176394\a31=110.29205512\d11=120.0014676\d12=-119.99920846\d2=-94.80252056\d21=179.91113724\d31=180.00138699\\Version=DEC-AXP-OSF/1-G98RevA.7\HF=-49.8886871\MP2=-50.2254153\PUHF=-49.8949664\PMP2-0=-50.229947\S2=0.799841\S2-1=0.771632\S2A=0.751413\RMSD=3.266e-09\RMSF=2.175e-05\Dipole=-0.540745,0.,-0.00006\PG=C01 [X(C1H9Ge1Sn1)]\\@

**QCISD/DZP//MP2/DZP**

QCISD=-50.2944583

**CCSD(T)/DZP//MP2/DZP**

CCSD(T)=-50.3043467

**B3LYP/DZP**

1\1\ MARCCENTRE-ANET05\PTS\UB3LYP\Gen\C1H9Ge1Sn1(2)\HIROSHI\13-Aug-2002\1\\#B3LYP/GEN PSEUDO=READ SCF=DIRECT OPT=(TS,EF,CALCFC) GEOM=CHECKPOINT GUESS=CHECK OPTCYC=100 DENSITY=CURRENT\\backside attack of C-Sn-Ge\\0,2\Sn\C,1,r1\H,1,r11,2,a11\H,1,r11,2,a11,3,d11,0\H,1,r11,2,a11,3,d12,0\Ge,1,r2,3,a2,4,d2,0\H,2,r21,1,a21,3,d21,0\H,2,r21,1,a21,4,d21,0\H,2,r21,1,a21,5,d21,0\H,6,r31,1,a31,3,d31,0\H,6,r31,1,a31,4,d31,0\H,6,r31,1,a31,5,d31,0\\r1=2.46954486\r2=2.7798718\r11=1.71280071\r21=1.08944376\r31=1.54758648\a11=85.20626659\a2=94.78910868\a21=103.64408977\a31=110.83255367\d11=120.00119379\d12=-120.00280064\d2=-98.23449218\d21=180.11426513\d31=180.03053961\\Version=DEC-AXP-OSF/1-G98RevA.7\HF=-50.5766766\S2=0.760357\S2-1=0.\S2A=0.750057\RMSD=4.970e-09\RMSF=5.572e-06\Dipole=0.0000017,0.0000195,0.5939597\PG=C01 [X(C1H9Ge1Sn1)]\\@

**Frontside transition state 5 (Y = Sn, Z = Ge)**

**UHF/DZP**

1\1\ MARCCENTRE-ANET02\FTS\UHF\Gen\C1H9Ge1Sn1(2)\HIROSHI\06-Aug-2002\1\\#UHF/GEN PSEUDO=READ SCF=DIRECT OPT=(TS,EF,CALCFC) GEOM=CHECKPOINT GUESS=CHECK OPTCYC=100\\frontside attack of C-Sn-Ge\\0,2\Sn\C,1,r1\Ge,1,r2,2,a1\H,1,r11,2,a11,3,d11,0\H,1,r12,2,a12,3,d12,0\H,1,r13,3,a13,4,d13,0\H,2,r21,1,a21,4,d21,0\H,2,r22,1,a22,4,d22,0\H,2,r23,1,a23,4,d23,0\H,3,r31,1,a31,2,d31,0\H,3,r32,1,a32,2,d32,0\H,3,r33,1,a33,2,d33,0\\r1=2.43126358\r2=2.93899385\r11=1.72877707\r12=1.71409306\r13=1.70622592\r21=1.08160067\r22=1.07989924\r23=1.07844291\r31=1.53608224\r32=1.53605362\r33=1.5346862\a1=73.00139409\a11=149.31640437\a12=87.53695971\a13=112.06570223\a21=95.35522224\a22=109.62646867\a23=110.86414834\a31=105.73113092\a32=107.53789184\a33=113.46596023\d11=-30.8321992\d12=221.10882686\d13=103.46231756\d21=152.95149247\d22=36.46988906\d23=-89.64306808\d31=-77.32750674\d32=-194.81357413\d33=42.90654439\\Version=DEC-AXP-OSF/1-G98RevA.7\HF=-49.890845\S2=0.842999\S2-1=0.\S2A=0.751725\RMSD=3.691e-09\RMSF=8.356e-06\Dipole=0.1673964,-0.0221627,0.53898\PG=C01[X(C1H9Ge1Sn1)]\\@

**MP2/DZP**

1\1\ MARCCENTRE-ANET06\FTS\UMP2-FC\Gen\C1H9Ge1Sn1(2)\HIROSHI\10-Aug-2002\1\\#MP2/GEN PSEUDO=READ SCF=DIRECT OPT=(TS,EF,CALCFC) GEOM=CHECKPOINT GUESS=CHECK OPTCYC=100 DENSITY=CURRENT\\frontside attack of C-Sn-Ge\\0,2\Sn\C,1,r1\Ge,1,r2,2,a1\H,1,r11,2,a11,3,d11,0\H,1,r12,2,a12,3,d12,0\H,1,r13,3,a13,4,d13,0\H,2,r21,1,a21,4,d21,0\H,2,r22,1,a22,4,d22,0\H,2,r23,1,a23,4,d23,0\H,3,r31,1,a31,2,d31,0\H,3,r32,1,a32,2,d32,0\H,3,r33,1,a33,2,d33,0\\r1=2.40831204\r2=2.79027472\r11=1.73751367\r12=1.7061668\r13=1.70618115\r21=1.09036982\r22=1.08811415\r23=1.08811287\r31=1.5336748\r32=1.53566955\r33=1.53367353\a1=71.92876936\a11=157.68797227\a12=89.9688406\a13=121.78198457\a21=95.60273828\a22=110.52652674\a23=110.51528969\a31=109.15960886\a32=109.46048477\a33=109.16021879\d11=0.07275237\d12=236.37578213\d13=101.70788375\d21=180.05257243\d22=63.20188315\d23=-63.09978562\d31=-59.77128701\d32=-180.00447568\d33=59.75850937\\Version=DEC-AXP-OSF/1-G98RevA.7\HF=-49.891258\MP2=-50.2286122\PUHF=-49.8981211\PMP2-0=-50.2337121\S2=0.809979\S2-1=0.778789\S2A=0.751213\RMSD=9.765e-09\RMSF=2.758e-06\Dipole=-0.2648307,0.3851516,0.0000467\PG=C01 [X(C1H9Ge1Sn1)]\\@

**QCISD/DZP//MP2/DZP**

QCISD=-50.2960317

**CCSD(T)/DZP//MP2/DZP**

CCSD(T)=-50.3057589

**B3LYP/DZP**

1\1\ MARCCENTRE-ANET06\FTS\UB3LYP\Gen\C1H9Ge1Sn1(2)\HIROSHI\13-Aug-2002\1\\#B3LYP/GEN PSEUDO=READ SCF=DIRECT OPT=(TS,EF,CALCFC) GEOM=CHECKPOINT GUESS=CHECK OPTCYC=100 DENSITY=CURRENT\\frontside attack of C-Sn-Ge\\0,2\Sn\C,1,r1\Ge,1,r2,2,a1\H,1,r11,2,a11,3,d11,0\H,1,r12,2,a12,3,d12,0\H,1,r13,3,a13,4,d13,0\H,2,r21,1,a21,4,d21,0\H,2,r22,1,a22,4,d22,0\H,2,r23,1,a23,4,d23,0\H,3,r31,1,a31,2,d31,0\H,3,r32,1,a32,2,d32,0\H,3,r33,1,a33,2,d33,0\\r1=2.41794956\r2=2.78905393\r11=1.75748318\r12=1.71652501\r13=1.71647536\r21=1.0915513\r22=1.08957059\r23=1.08957175\r31=1.54435136\r32=1.54446223\r33=1.54435069\a1=76.21346633\a11=161.7887607\a12=89.75065136\a13=122.26364471\a21=97.64375743\a22=108.51501925\a23=108.50681802\a31=109.21951295\a32=110.60222919\a33=109.22316894\d11=-0.15916517\d12=236.52752219\d13=99.22019388\d21=179.81827925\d22=61.96243115\d23=-62.3258875\d31=-59.41447693\d32=-179.99799768\d33=59.41547348\\Version=DEC-AXP-OSF/1-G98RevA.7\HF=-50.5749527\S2=0.76173\S2-1=0.\S2A=0.750069\RMSD=4.961e-09\RMSF=1.548e-05\Dipole=0.1117824,-0.0001584,0.4647385\PG=C01 [X(C1H9Ge1Sn1)]\\@

**Backside transition state 4 (Y = Sn, Z = Sn)**

**UHF/DZP**

1\1\ MARCCENTRE-ANET06\PTS\UHF\Gen\C1H9Sn2(2)\HIROSHI\06-Aug-2002\1\\#UHF/GEN PSEUDO=READ SCF=DIRECT OPT=(TS,EF,CALCFC) GEOM=CHECKPOINT GUESS=CHECK OPTCYC=100\\backside attack of C-Sn-Sn\\0,2\Sn\C,1,r1\H,1,r11,2,a11\H,1,r11,2,a11,3,d11,0\H,1,r11,2,a11,3,d12,0\Sn,1,r2,3,a2,4,d2,0\H,2,r21,1,a21,3,d21,0\H,2,r21,1,a21,4,d21,0\H,2,r21,1,a21,5,d21,0\H,6,r31,1,a31,3,d31,0\H,6,r31,1,a31,4,d31,0\H,6,r31,1,a31,5,d31,0\\r1=2.44130979\r2=3.07270901\r11=1.69848242\r21=1.07976399\r31=1.71053945\a11=90.32747612\a2=89.6721504\a21=104.69125705\a31=110.69089517\d11=119.99986761\d12=-120.00006864\d2=-89.43216291\d21=179.97698573\d31=180.01657632\\Version=DEC-AXP-OSF/1-G98RevA.7\HF=-49.481389\S2=0.84042\S2-1=0.\S2A=0.75303\RMSD=5.131e-09\RMSF=5.723e-06\Dipole=-0.0000025,0.0000043,0.7177494\PG=C01 [X(C1H9Sn2)]\\@

**MP2/DZP**

1\1\ MARCCENTRE-ANET02\PTS\UMP2-FC\Gen\C1H9Sn2(2)\HIROSHI\07-Aug-2002\1\\#MP2/GEN PSEUDO=READ SCF=DIRECT OPT=(TS,EF,CALCFC) GEOM=CHECKPOINT GUESS=CHECK OPTCYC=100 DENSITY=CURRENT\\backside attack of C-Sn-Sn\\0,2\Sn\C,1,r1\H,1,r11,2,a11\H,1,r11,2,a11,3,d11,0\H,1,r11,2,a11,3,d12,0\Sn,1,r2,3,a2,4,d2,0\H,2,r21,1,a21,3,d21,0\H,2,r21,1,a21,4,d21,0\H,2,r21,1,a21,5,d21,0\H,6,r31,1,a31,3,d31,0\H,6,r31,1,a31,4,d31,0\H,6,r31,1,a31,5,d31,0\\r1=2.43135293\r2=2.95249916\r11=1.70226382\r21=1.08754044\r31=1.7073479\a11=86.47686001\a2=93.50133222\a21=104.37672838\a31=110.83620106\d11=120.00056787\d12=-119.99954515\d2=-96.04017791\d21=179.94879392\d31=180.18387252\\Version=DEC-AXP-OSF/1-G98RevA.7\HF=-49.4841732\MP2=-49.8110265\PUHF=-49.490121\PMP2-0=-49.815329\S2=0.797772\S2-1=0.770923\S2A=0.751275\RMSD=8.323e-09\RMSF=6.517e-06\Dipole=-0.649362,0.0001583,-0.00002\PG=C01 [X(C1H9Sn2)]\\@

**QCISD/DZP//MP2/DZP**

QCISD=-49.8800575

**CCSD(T)/DZP//MP2/DZP**

CCSD(T)=-49.8896559

**B3LYP/DZP**

1\1\ MARCCENTRE-ANET04\PTS\UB3LYP\Gen\C1H9Sn2(2)\HIROSHI\12-Aug-2002\1\\#B3LYP/GEN PSEUDO=READ SCF=DIRECT OPT=(TS,EF,CALCFC) GEOM=CHECKPOINT GUESS=CHECK OPTCYC=100 DENSITY=CURRENT\\backside attack of C-Sn-Sn\\0,2\Sn\C,1,r1\H,1,r11,2,a11\H,1,r11,2,a11,3,d11,0\H,1,r11,2,a11,3,d12,0\Sn,1,r2,3,a2,4,d2,0\H,2,r21,1,a21,3,d21,0\H,2,r21,1,a21,4,d21,0\H,2,r21,1,a21,5,d21,0\H,6,r31,1,a31,3,d31,0\H,6,r31,1,a31,4,d31,0\H,6,r31,1,a31,5,d31,0\\r1=2.51729496\r2=2.95080366\r11=1.7102191\r21=1.08900017\r31=1.71783363\a11=83.79021825\a2=96.18960279\a21=102.96970607\a31=111.36637309\d11=120.00505385\d12=-119.9976116\d2=-100.5780344\d21=179.99805304\d31=180.00579005\\Version=DEC-AXP-OSF/1-G98RevA.7\HF=-50.1687444\S2=0.760063\S2-1=0.\S2A=0.750052\RMSD=5.137e-09\RMSF=7.918e-06\Dipole=-0.0001478,0.0002401,0.7035378\PG=C01 [X(C1H9Sn2)]\\@

**Frontside transition state 5 (Y = Sn, Z = Sn)**

**UHF/DZP**

1\1\ MARCCENTRE-ANET07\FTS\UHF\Gen\C1H9Sn2(2)\HIROSHI\06-Aug-2002\1\\#UHF/GEN PSEUDO=READ SCF=DIRECT OPT=(TS,EF,CALCFC) GEOM=CHECKPOINT GUESS=CHECK OPTCYC=100\\frontside attack of C-Sn-Sn\\0,2\Sn\C,1,r1\Sn,1,r2,2,a1\H,1,r11,2,a11,3,d11,0\H,1,r12,2,a12,3,d12,0\H,1,r13,3,a13,4,d13,0\H,2,r21,1,a21,4,d21,0\H,2,r22,1,a22,4,d22,0\H,2,r23,1,a23,4,d23,0\H,3,r31,1,a31,2,d31,0\H,3,r32,1,a32,2,d32,0\H,3,r33,1,a33,2,d33,0\\r1=2.43601422\r2=3.12028195\r11=1.70742982\r12=1.71072806\r13=1.72934301\r21=1.07967199\r22=1.0820242\r23=1.07929131\r31=1.70642263\r32=1.70744867\r33=1.70664216\a1=72.09583981\a11=93.91110049\a12=89.4227006\a13=81.43900865\a21=110.17817175\a22=94.39299486\a23=111.45673713\a31=110.1210394\a32=110.42468774\a33=108.07299189\d11=-117.92930518\d12=130.61734967\d13=101.65659763\d21=174.90527358\d22=58.71024605\d23=-57.95592124\d31=-55.62943406\d32=-176.83665448\d33=63.34013555\\Version=DEC-AXP-OSF/1-G98RevA.7\HF=-49.4862555\S2=0.842293\S2-1=0.\S2A=0.751633\RMSD=5.649e-09\RMSF=3.218e-06\Dipole=0.0880501,0.0072397,0.4797606\PG=C01 [X(C1H9Sn2)]\\@

**MP2/DZP**

1\1\ MARCCENTRE-ANET04\FTS\UMP2-FC\Gen\C1H9Sn2(2)\HIROSHI\08-Aug-2002\1\\#MP2/GEN PSEUDO=READ SCF=DIRECT OPT=(TS,EF,CALCFC) GEOM=CHECKPOINTGUESS=CHECK OPTCYC=100 DENSITY=CURRENT\\frontside attack of C-Sn-Sn\\0,2\Sn\C,1,r1\Sn,1,r2,2,a1\H,1,r11,2,a11,3,d11,0\H,1,r12,2,a12,3,d12,0\H,1,r13,3,a13,4,d13,0\H,2,r21,1,a21,4,d21,0\H,2,r22,1,a22,4,d22,0\H,2,r23,1,a23,4,d23,0\H,3,r31,1,a31,2,d31,0\H,3,r32,1,a32,2,d32,0\H,3,r33,1,a33,2,d33,0\\r1=2.45374864\r2=2.94523997\r11=1.7055116\r12=1.70549801\r13=1.73655345\r21=1.08810082\r22=1.08970202\r23=1.08808927\r31=1.70303953\r32=1.70588808\r33=1.70302738\a1=71.51186262\a11=88.74456068\a12=88.76768081\a13=87.84678122\a21=110.81714512\a22=93.83339227\a23=110.78441635\a31=109.36750085\a32=110.18595974\a33=109.28463818\d11=-123.72210866\d12=123.6360674\d13=103.27171125\d21=172.7271167\d22=56.36703649\d23=-59.99030491\d31=-59.62299801\d32=-179.97380386\d33=59.72034201\\Version=DEC-AXP-OSF/1-G98RevA.7\HF=-49.4874214\MP2=-49.8150187\PUHF=-49.4938385\PMP2-0=-49.8198031\S2=0.807175\S2-1=0.777749\S2A=0.75109\RMSD=4.954e-09\RMSF=7.162e-06\Dipole=0.2221483,0.3756338,-0.0002661\PG=C01 [X(C1H9Sn2)]\\@

**QCISD/DZP//MP2/DZP**

QCISD=-49.8823319

**CCSD(T)/DZP//MP2/DZP**

CCSD(T)=-49.8917462

**B3LYP/DZP**

1\1\ MARCCENTRE-ANET02\FTS\UB3LYP\Gen\C1H9Sn2(2)\HIROSHI\12-Aug-2002\1\\#B3LYP/GEN PSEUDO=READ SCF=DIRECT OPT=(TS,EF,CALCFC) GEOM=CHECKPOINT GUESS=CHECK OPTCYC=100 DENSITY=CURRENT\\frontside attack of C-Sn-Sn\\0,2\Sn\C,1,r1\Sn,1,r2,2,a1\H,1,r11,2,a11,3,d11,0\H,1,r12,2,a12,3,d12,0\H,1,r13,3,a13,4,d13,0\H,2,r21,1,a21,4,d21,0\H,2,r22,1,a22,4,d22,0\H,2,r23,1,a23,4,d23,0\H,3,r31,1,a31,2,d31,0\H,3,r32,1,a32,2,d32,0\H,3,r33,1,a33,2,d33,0\\r1=2.4909664\r2=2.9396425\r11=1.71491602\r12=1.714916\r13=1.7523966\r21=1.08928823\r22=1.09070502\r23=1.08928124\r31=1.7135449\r32=1.71491282\r33=1.71355731\a1=75.29251134\a11=87.74661291\a12=87.74730803\a13=88.44778023\a21=108.49564169\a22=95.20495997\a23=108.41296057\a31=109.6694633\a32=110.98444786\a33=109.65997078\d11=-123.43634255\d12=123.48854936\d13=102.04568156\d21=174.16531691\d22=56.74207793\d23=-60.67046878\d31=-59.34241649\d32=-179.91392429\d33=59.52212407\\Version=DEC-AXP-OSF/1-G98RevA.7\HF=-50.1676645\S2=0.761485\S2-1=0.\S2A=0.75006\RMSD=3.123e-09\RMSF=2.589e-05\Dipole=0.0569938,-0.0000548,0.4471397\PG=C01 [X(C1H9Sn2)]\\@

**Disilane (H3SiSiH3)**

RHF/6-311G** HF = -581.3559662

RHF/DZP HF = -11.0326259

MP2/6-311G** MP2= -581.5724070

MP2/DZP MP2 = -11.238495

MP2/cc-pVDZ MP2 = -581.5533457

MP2/aug-cc-pVDZ MP2 = -581.5648006

QCISD/6-311G**//MP2/6-311G** QCISD = -581.6210136

QCISD/DZP//MP2/DZP QCISD = -11.2856523

QCISD/cc-pVDZ//MP2/cc-pVDZ QCISD = -581.6054030

QCISD/aug-cc-pVDZ//MP2/aug-cc-pVDZ QCISD = -581.6181223

CCSD(T)/DZP//MP2/DZP CCSD(T) = -11.2908322

CCSD(T)/aug-cc-pVDZ//MP2/aug-cc-pVDZ CCSD(T) = -581.6249299

B3LYP/6-311G** HF = -582.6383712

B3LYP/DZP HF = -11.3994142

These data were taken from Supporting Information of S. M. Horvat, C. H. Schiesser and L. M. Wild, *Organometallics*, **2000**, *19*, 1239 (OM9980886J).

**CCSD(T)/6-311G**//MP2/6-311G****

CCSD(T) = -581.6269254

**CCSD(T)/cc-pVDZ//MP2/cc-pVDZ**

CCSD(T) = -581.6112175

**CCSD(T)/aug-cc-pVDZ//MP2/aug-cc-pVDZ**

CCSD(T) = -581.6249271

**Digermane (H3GeGeH3)**

RHF/DZP HF = -10.7716078

MP2/DZP MP2 = -10.9708206

QCISD/DZP//MP2/DZP QCISD = -11.0166759

CCSD(T)/DZP//MP2/DZP CCSD(T) = -11.0217504

B3LYP/DZP HF = -11.1497285

These data were taken from Supporting Information of S. M. Horvat, C. H. Schiesser and L. M. Wild, *Organometallics*, **2000**, *19*, 1239 (OM9980886J).

**Distannane (H3SnSnH3)**

RHF/DZP HF = -9.9539551

MP2/DZP MP2 = -10.1359444

QCISD/DZP//MP2/DZP QCISD = -10.1813317

CCSD(T)/DZP//MP2/DZP CCSD(T) = -10.1860617

B3LYP/DZP HF = -10.3290969

These data were taken from Supporting Information of S. M. Horvat, C. H. Schiesser and L. M. Wild, *Organometallics*, **2000**, *19*, 1239 (OM9980886J).

**Silylgermane (H3SiGeH3)**

RHF/DZP HF = -10.9017391

MP2/DZP MP2 = -11.1041984

QCISD/DZP//MP2/DZP QCISD = -11.1506620

CCSD(T)/DZP//MP2/DZP CCSD(T) = -11.1557847

B3LYP/DZP HF = -11.2741867

These data were taken from Supporting Information of S. M. Horvat, C. H. Schiesser and L. M. Wild, *Organometallics*, **2000**, *19*, 1239 (OM9980886J).

**Silylstannane (H3SiSnH3)**

RHF/DZP HF = -10.4900361

MP2/DZP MP2 = -10.6841850

QCISD/DZP//MP2/DZP QCISD = -10.7304508

CCSD(T)/DZP//MP2/DZP CCSD(T) = -10.7354131

B3LYP/DZP HF = -10.8613496

These data were taken from Supporting Information of S. M. Horvat, C. H. Schiesser and L. M. Wild, *Organometallics*, **2000**, *19*, 1239 (OM9980886J).

**Germylstannane (H3GeSnH3)**

RHF/DZP HF = -10.3617154

MP2/DZP MP2 = -10.5525067

QCISD/DZP//MP2/DZP QCISD = -10.5981371

CCSD(T)/DZP//MP2/DZP CCSD(T) = -10.6030422

B3LYP/DZP HF = -10.7385429

These data were taken from Supporting Information of S. M. Horvat, C. H. Schiesser and L. M. Wild, *Organometallics*, **2000**, *19*, 1239 (OM9980886J).

**Methylsilane (H3CSiH3)**

RHF/6-311G** HF = -330.31030

RHF/DZP MP2= -45.1462313

MP2/6-311G** MP2 = -330.57985

MP2/DZP MP2 = -45.39825

QCISD/6-311G**//MP2/6-311G** QCISD = -330.62054

QCISD/DZP//MP2/DZP QCISD = -45.43818

These data were taken from C. H. Schiesser, M. L. Styles and L. M. Wild, *J. Chem. Soc., Perkin 2 Trans.*, **1996**, 2257.

**MP2/cc-pVDZ**

1\1\ MARCCENTRE-ANET03\FOpt\RMP2-FC\CC-pVDZ\C1H6Si1\HIROSHI\29-Oct-2002\1\\#MP2/CC-PVDZ SCF=DIRECT OPT=GRAD GEOM=CHECKPOINT GUESS=CHECK DENSITY=CURRENT\\SiH3CH3\\0,1\H\Si,1,r1\C,2,r2,1,a1\H,2,r1,3,a1,1,120.,0\H,2,r1,3,a1,1,-120.,0\H,3,r3,2,a2,1,60.,0\H,3,r3,2,a2,1,-60.,0\H,3,r3,2,a2,1,180.,0\\r1=1.4904275\r2=1.89192761\r3=1.10249198\a1=110.56134479\a2=110.73104027\\Version=DEC-AXP-OSF/1-G98RevA.7\State=1-A1\HF=-330.2912029\MP2=-330.5505041\RMSD=4.107e-09\RMSF=1.301e-05\Dipole=0.,0.,-0.2900833\PG=C03V [C3(C1Si1),3SGV(H2)]\\@

**MP2/aug-cc-pVDZ**

1\1\ MARCCENTRE-ANET02\FOpt\RMP2-FC\Aug-CC-pVDZ\C1H6Si1\HIROSHI\30-Oct-2002\1\\#MP2/AUG-CC-PVDZ SCF=DIRECT OPT=GRAD GEOM=CHECKPOINT GUESS=CHECK DENSITY=CURRENT\\SiH3CH3\\0,1\H\Si,1,r1\C,2,r2,1,a1\H,2,r1,3,a1,1,120.,0\H,2,r1,3,a1,1,-120.,0\H,3,r3,2,a2,1,60.,0\H,3,r3,2,a2,1,-60.,0\H,3,r3,2,a2,1,180.,0\\r1=1.49199461\r2=1.89572716\r3=1.10159348\a1=110.46346947\a2=110.88208889\\Version=DEC-AXP-OSF/1-G98RevA.7\State=1-A1\HF=-330.2930344\MP2=-330.5638217\RMSD=6.565e-09\RMSF=2.106e-05\Dipole=0.,0.,-0.2711262\PG=C03V [C3(C1Si1),3SGV(H2)]\\@

**QCISD/cc-pVDZ//MP2/cc-pVDZ**

QCISD = -330.5938507

**QCISD/aug-cc-pVDZ//MP2/aug-cc-pVDZ**

QCISD = -330.6076708

**CCSD(T)/6-311G**//MP2/6-311G****

CCSD(T) = -330.6281571

**CCSD(T)/DZP//MP2/DZP**

CCSD(T) = -45.4443547

**CCSD(T)/cc-pVDZ//MP2/cc-pVDZ**

CCSD(T) = -330.6007132

**CCSD(T)/aug-cc-pVDZ//MP2/aug-cc-pVDZ**

CCSD(T) = -330.6158539

**B3LYP/6-311G****

1\1\ MARCCENTRE-ANET03\FOpt\RB3LYP\6-311G(d,p)\C1H6Si1\HIROSHI\30-Oct-2002\1\\#B3LYP/6-311G** SCF=DIRECT OPT=GRAD GEOM=CHECKPOINT GUESS=CHECK DENSITY=CURRENT\\SiH3CH3\\0,1\H\Si,1,r1\C,2,r2,1,a1\H,2,r1,3,a1,1,120.,0\H,2,r1,3,a1,1,-120.,0\H,3,r3,2,a2,1,60.,0\H,3,r3,2,a2,1,-60.,0\H,3,r3,2,a2,1,180.,0\\r1=1.48726414\r2=1.88484958\r3=1.09305051\a1=110.66353738\a2=110.96612622\\Version=DEC-AXP-OSF/1-G98RevA.7\State=1-A1\HF=-331.2532581\RMSD=3.735e-09\RMSF=1.275e-05\Dipole=0.2722194,0.,0.1026652\PG=C03V [C3(C1Si1),3SGV(H2)]\\@

**B3LYP/DZP**

1\1\ MARCCENTRE-ANET08\FOpt\RB3LYP\Gen\C1H6Si1\HIROSHI\02-Sep-2002\1\\#B3LYP/GEN PSEUDO=READ SCF=DIRECT OPT=GRAD GEOM=CHECKPOINT GUESS=CHECK DENSITY=CURRENT\\SiH3CH3\\0,1\H\Si,1,r1\C,2,r2,1,a1\H,2,r1,3,a1,1,120.,0\H,2,r1,3,a1,1,-120.,0\H,3,r3,2,a2,1,60.,0\H,3,r3,2,a2,1,-60.,0\H,3,r3,2,a2,1,180.,0\\r1=1.47863759\r2=1.88404038\r3=1.09567795\a1=110.72681184\a2=110.92971915\\Version=DEC-AXP-OSF/1-G98RevA.7\State=1-A1\HF=-45.6276444\RMSD=5.041e-09\RMSF=7.305e-05\Dipole=0.251344,0.,0.0951094\PG=C03V [C3(C1Si1),3SGV(H2)]\\@

**Methylgermane (H3CGeH3)**

RHF/DZP HF = -45.00768

MP2/DZP MP2 = -45.25778

QCISD/DZP QCISD = -45.29715

These data were taken from C. H. Schiesser, M. L. Styles and L. M. Wild, *J. Chem. Soc., Perkin 2 Trans.*, **1996**, 2257.

**CCSD(T)/DZP//MP2/DZP**

CCSD(T) = -45.3033906

**B3LYP/DZP**

1\1\ MARCCENTRE-ANET03\FOpt\RB3LYP\Gen\C1H6Ge1\HIROSHI\29-Oct-2002\1\\#B3LYP/GEN PSEUDO=READ SCF=DIRECT OPT=GRAD\\GeH3CH3\\0,1\H\Ge,1,r1\C,2,r2,1,a1\H,2,r1,3,a1,1,120.,0\H,2,r1,3,a1,1,-120.,0\H,3,r3,2,a2,1,60.,0\H,3,r3,2,a2,1,-60.,0\H,3,r3,2,a2,1,180.,0\\r1=1.54449312\r2=1.97160017\r3=1.09465464\a1=110.50583263\a2=110.50801149\\Version=DEC-AXP-OSF/1-G98RevA.7\State=1-A1\HF=-45.495957\RMSD=7.625e-09\RMSF=4.923e-05\Dipole=0.2517325,0.,0.0941481\PG=C03V [C3(C1Ge1),3SGV(H2)]\\@

**Methylstannane (H3CSnH3)**

RHF/DZP HF = -44.59107

MP2/DZP MP2 = -44.83387

QCISD/DZP//MP2/DZP QCISD = -44.87269

These data were taken from C. H. Schiesser, M. L. Styles and L. M. Wild, *J. Chem. Soc., Perkin 2 Trans.*, **1996**, 2257.

CCSD(T)/DZP//MP2/DZP CCSD(T) = -44.8787932

B3LYP/DZP HF = -45.0797091

These data were taken from Supporting Information of S. M. Horvat, C. H. Schiesser and L. M. Wild, *Organometallics*, **2000**, *19*, 1239 (OM9980886J).

**Silyl radical (SiH3)**

UHF/6-311G** HF = -290.6320187

UHF/DZP HF = -5.46984

MP2/6-311G** MP2 = -290.727997

MP2/DZP MP2 = -5.55964

MP2/cc-pVDZ MP2 = -290.7194559

MP2/aug-cc-pVDZ MP2 = -290.7246244

QCISD/6-311G**//MP2/6-311G** QCISD = -290.7526693

QCISD/DZP//MP2/DZP QCISD = -5.58357

QCISD/cc-pVDZ//MP2/cc-pVDZ QCISD = -290.746195

QCISD/aug-cc-pVDZ//MP2/aug-cc-pVDZ QCISD = -290.7522833

CCSD(T)/6-311G**//MP2/6-311G** CCSD(T) = -290.7548061

CCSD(T)/DZP//MP2/DZP CCSD(T) = -5.585445

CCSD(T)/cc-pVDZ//MP2/cc-pVDZ CCSD(T) = -290.7482998

CCSD(T)/aug-cc-pVDZ//MP2/aug-cc-pVDZ CCSD(T) = -290.754806

B3LYP/6-311G** HF = -291.2610821

B3LYP/DZP HF = -5.640982

These data were taken from Supporting Information of S. M. Horvat, C. H. Schiesser and L. M. Wild, *Organometallics*, **2000**, *19*, 1239 (OM9980886J).

**Germyl radical (GeH3)**

UHF/DZP HF = -5.34597

MP2/DZP MP2 = -5.43346

QCISD/DZP//MP2/DZP QCISD = -5.45694

CCSD(T)/DZP//MP2/DZP CCSD(T) = -5.4588155

B3LYP/DZP HF = -5.5234003

These data were taken from Supporting Information of S. M. Horvat, C. H. Schiesser and L. M. Wild, *Organometallics*, **2000**, *19*, 1239 (OM9980886J).

**Stannyl radical (SnH3)**

UHF/DZP HF = -4.94363

MP2/DZP MP2 = -5.02396

QCISD/DZP//MP2/DZP QCISD = -5.04697

CCSD(T)/DZP//MP2/DZP CCSD(T) = -5.049032

B3LYP/DZP HF = -5.1207262

These data were taken from Supporting Information of S. M. Horvat, C. H. Schiesser and L. M. Wild, *Organometallics*, **2000**, *19*, 1239 (OM9980886J).

**Methy radical (CH3)**

UHF/6-311G** HF = -39.57291

UHF/DZP HF = -39.57176

MP2/6-311G** MP2 = -39.70724

MP2/DZP MP2 = -39.69727

QCISD/6-311G**//MP2/6-311G** QCISD = -39.72913

QCISD/DZP//MP2/DZP QCISD = -39.71891

These data were taken from C. H. Schiesser, M. L. Styles and L. M. Wild, *J. Chem. Soc., Perkin 2 Trans.*, **1996**, 2257.

CCSD(T)/DZP//MP2/DZP CCSD(T) = -39.7213

B3LYP/DZP HF = -39.8489

These data were taken from Supporting Information of S. M. Horvat, C. H. Schiesser and L. M. Wild, *Organometallics*, **2000**, *19*, 1239 (OM9980886J).

**MP2/cc-pVDZ**

1\1\ MARCCENTRE-ANET04\POpt\UMP2-FC\CC-pVDZ\C1H3(2)\HIROSHI\31-Oct-2002\1\\#MP2/CC-PVDZ SCF=DIRECT OPT=GRAD GEOM=CHECKPOINT GUESS=CHECK DENSITY=CURRENT\\CH3 radical\\0,2\C\H,1,r1\H,1,r1,2,a1\H,1,r1,2,a1,3,180.,0\\r1=1.08956002\a1=120.\\Version=DEC-AXP-OSF/1-G98RevA.7\State=2-A2"\HF=-39.5636697\MP2=-39.6906404\PUHF=-39.5666899\PMP2-0=-39.6925851\S2=0.761696\S2-1=0.753334\S2A=0.750076\RMSD=2.299e-09\RMSF=3.833e-08\Dipole=0.,0.,0.\PG=D03H [O(C1),3C2(H1)]\\@

**MP2/aug-cc-pVDZ**

1\1\ MARCCENTRE-ANET06\POpt\UMP2-FC\Aug-CC-pVDZ\C1H3(2)\HIROSHI\31-Oct-2002\1\\#MP2/AUG-CC-PVDZ SCF=DIRECT OPT=GRAD GEOM=CHECKPOINT GUESS=CHECK DENSITY=CURRENT\\CH3 radical\\0,2\C\H,1,r1\H,1,r1,2,a1\H,1,r1,2,a1,3,180.,0\\r1=1.08763295\a1=120.\\Version=DEC-AXP-OSF/1-G98RevA.7\State=2-A2"\HF=-39.5656675\MP2=-39.6982656\PUHF=-39.5686423\PMP2-0=-39.7001655\S2=0.761599\S2-1=0.753186\S2A=0.750071\RMSD=4.722e-09\RMSF=5.772e-05\Dipole=0.,0.,0.\PG=D03H [O(C1),3C2(H1)]\\@

**QCISD/cc-pVDZ//MP2/cc-pVDZ**

QCISD = -39.7137158

**QCISD/aug-cc-pVDZ//MP2/aug-cc-pVDZ**

QCISD = -39.7214196

**CCSD(T)/6-311G**//MP2/6-311G****

CCSD(T) = -39.7322063

**CCSD(T)/cc-pVDZ//MP2/cc-pVDZ**

CCSD(T) = -39.7162791

**CCSD(T)/aug-cc-pVDZ//MP2/aug-cc-pVDZ**

CCSD(T) = -39.724649

**B3LYP/6-311G****

1\1\ MARCCENTRE-ANET07\POpt\UB3LYP\6-311G(d,p)\C1H3(2)\HIROSHI\31-Oct-2002\1\\#B3LYP/6-311G** SCF=DIRECT OPT=GRAD GEOM=CHECKPOINT GUESS=CHECK DENSITY=CURRENT\\CH3 radical\\0,2\C\H,1,r1\H,1,r1,2,a1\H,1,r1,2,a1,3,180.,0\\r1=1.08049239\a1=120.\\Version=DEC-AXP-OSF/1-G98RevA.7\State=2-A2"\HF=-39.8537575\S2=0.753512\S2-1=0.\S2A=0.750006\RMSD=9.561e-09\RMSF=9.824e-06\Dipole=0.,0.,0.\PG=D03H [O(C1),3C2(H1)]\\@
